# Supplementary material for: Rewiring of Glucose and Lipid Metabolism Induced by G Protein-Coupled Receptor 17 Silencing Enables the Transition of Oligodendrocyte Progenitors to Myelinating Cells
Source: MDPI journal article supplement (doi:10.3390/cells11152369), 2022-08-02
Supplement: s1 [file s1]

# Rewiring of glucose and lipid metabolism induced by G protein-coupled receptor 17 silencing enables the transition of oligodendrocyte progenitors to myelinating cells

Davide Marangon<sup>1</sup>, Matteo Audano<sup>2</sup>, Silvia Pedretti<sup>2</sup>, Marta Fumagalli<sup>2</sup>, Nico Mitro<sup>2</sup>, Davide Lecca<sup>1</sup>, Donatella Caruso<sup>2</sup>, Maria P. Abbracchio<sup>1,\*</sup>

<sup>1</sup> Department of Pharmaceutical Sciences, Università degli Studi di Milano; davide.marangon@unimi.it (D.M.); davide.lecca@unimi.it (D.L.)

<sup>2</sup> Department of Pharmacological and Biomolecular Sciences, Università degli Studi di Milano; matteo.audano@unimi.it (M.A.); silvia.pedretti@unimi.it (S.P.); marta.fumagalli@unimi.it (M.F.); nico.mitro@unimi.it (N.M.); donatella.caruso@unimi.it (D.C.)

\* Correspondence: mariapia.abbracchio@unimi.it; Tel.: +390250318304

## Supplementary Material

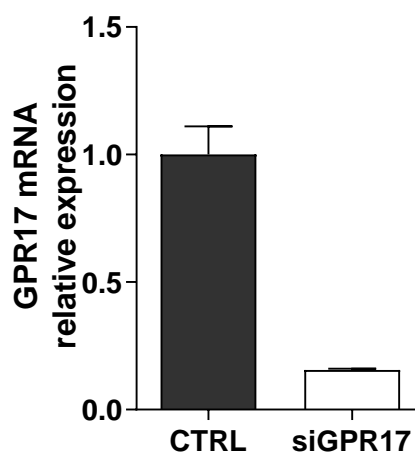

**Figure S1. GPR17 silencing with specific siRNAs.** Oligodendrocyte precursor cells (OPCs) were plated in presence of growth factors (bFGF and PDGF) for 3 days to promote proliferation. Then, cells were switched to differentiating medium, and simultaneously transfected with a pool of specific GPR17 siRNAs (or scramble siRNAs for control cells) to obliterate GPR17 expression. OPCs were lysed 48 hours after transfection for subsequent RNA extraction and microarray analysis. In these samples, GPR17 expression was reduced to 20% as determined by qRT-PCR. Data are presented as mean  $\pm$  SD from 2 independent experiments.

**Table S1.** Up- and down-regulation of key genes involved in lipid synthesis induced by GPR17 silencing.

| Gene Symbol | Gene name                                                | Refseq       | LOG2 FC |
|-------------|----------------------------------------------------------|--------------|---------|
| Acsl3       | Acyl-CoA synthetase long-chain family member 3           | NM_057107    | 1.51    |
| Acsm1       | Acyl-CoA synthetase medium-chain family member 1         | NM_001108502 | -2.71   |
| Ccl2        | Chemokine (C-C motif) ligand 2                           | NM_031530    | -3.38   |
| Cd40        | CD40 molecule, TNF receptor superfamily member 5         | XM_006235511 | 1.58    |
| Cxcl10      | Chemokine (C-X-C motif) ligand 10                        | NM_139089    | -1.93   |
| Cxcl12      | Chemokine (C-X-C motif) ligand 12                        | NM_001033883 | 2.70    |
| Cyp7b1      | Cytochrome P450, family 7, subfamily b, polypeptide 1    | NM_019138    | -2.31   |
| Dab2        | Disabled 2, mitogen-responsive phosphoprotein            | NM_024159    | -1.66   |
| Elovl2      | ELOVL fatty acid elongase 2                              | NM_001109118 | -1.51   |
| Fabp5       | Fatty acid binding protein 5, epidermal                  | NM_145878    | -1.54   |
| Gad2        | Glutamate decarboxylase 2                                | NM_012563    | -1.74   |
| Ggt1        | Gamma-glutamyltransferase 1                              | NM_053840    | 1.63    |
| Grem2       | Gremlin 2                                                | NM_001105974 | -1.85   |
| Grm5        | Glutamate receptor, metabotropic 5                       | NM_017012    | -2.11   |
| Hpgds       | Hematopoietic prostaglandin D synthase                   | XM_006236602 | -2.10   |
| Iapp        | Amylin                                                   | XM_006237614 | 3.75    |
| Igf2bp2     | Insulin-like growth factor binding protein 2             | NM_013122    | -1.57   |
| Kdr         | Kinase insert domain receptor                            | NM_013062    | 1.60    |
| Klf5        | Kruppel-like factor 5                                    | NM_053394    | -1.55   |
| Mog         | Myelin oligodendrocyte glycoprotein                      | NM_022668    | -1.59   |
| Ngfr        | Nerve growth factor receptor                             | NM_012610    | -1.92   |
| Nr1h3       | Nuclear receptor subfamily 1, group H, member 3          | NM_031627    | 1.92    |
| Pgf         | Placental growth factor                                  | NM_053595    | 3.16    |
| Phka        | Phosphorylase kinase, alpha 1                            | XM_006257101 | -1.55   |
| Pnpla3      | Patatin-like phospholipase domain containing 3           | NM_001282324 | 1.50    |
| Ptgds       | Prostaglandin D2 synthase                                | NM_013015    | 1.99    |
| Rgs2        | Regulator of G-protein signaling 2                       | NM_053453    | 1.69    |
| S1pr3       | Sphingosine-1-phosphate receptor 3                       | NM_001271143 | -1.53   |
| Sema3a      | Semaphorin 3A                                            | XM_006235989 | -1.51   |
| Serinc2     | Serine incorporator 2                                    | NM_001031656 | -1.55   |
| Sphk1       | Sphingosine kinase 1                                     | NM_133386    | 2.49    |
| Sptssb      | Serine palmitoyltransferase, small subunit B             | NM_001271299 | -1.78   |
| Srebf1      | Sterol regulatory element binding transcription factor 1 | NM_001276707 | 1.65    |
| Tnf         | Tumor necrosis factor                                    | NM_012675    | -4.54   |
| Vegfa       | Vascular endothelial growth factor A                     | NM_001287107 | 1.63    |
| Wnt4        | Wingless-type MMTV integration site family, member 4     | NM_053402    | 1.77    |
| Wnt5a       | Wingless-type MMTV integration site family, member 5A    | XM_008771007 | -1.79   |

**Table S2. GO-based enrichment analysis on DEGs after GPR17 silencing in OPCs.** The Toppgene suite has been used to perform a GO-based enrichment analysis on the DEGs. P-value method: probability density function. Multiple correction method: false discovery rate (FDR) and the Benjamini-Hochberg (B&H) method. The table shows all the biological processes that reach the statistical significance and the associated genes (Hit Count in Dataset gene symbol).

| ID         | Name                                                             | q-value<br>FDR B&H | Hit Count in<br>Dataset | Hit Count<br>in Genome | Hit Count in Dataset (gene symbol)                                                                                                                                                                                                                 |
|------------|------------------------------------------------------------------|--------------------|-------------------------|------------------------|----------------------------------------------------------------------------------------------------------------------------------------------------------------------------------------------------------------------------------------------------|
| GO:0048667 | cell morphogenesis involved in neuron differentiation            | 1.71E-03           | 38                      | 909                    | PRMT8,RPS6KA5,LGR4,GRXCR1,LRTM2,WNT4,CHN1,SEMA3A,S100B,MYO3B,FGFR2,MMP14,PLS1,CXCL12,VEGFA,COL6A3,SEMA4B,WNT5A,PPFIA2,SLI-TRK3,CRMP1,SLI-TRK5,AUTS2,ATP2B2,SEMA3E,HECW1,SRRM4,FSTL4,GFRA2,NEC-TIN1,NGFR,CNTN2,SHANK1,NTRK3,GRB10,GRIN1,LZTS1,EPHA4 |
| GO:0048754 | branching morphogenesis of an epithelial tube                    | 1.71E-03           | 16                      | 210                    | LGR4,WNT4,ACVR1,PGF,SEMA3A,FGFR2,MMP14,CXCL12,VEGFA,WNT5A,CELSR1,SEMA3E,MYCN,KDR,TNF,CSMD1                                                                                                                                                         |
| GO:0090102 | cochlea development                                              | 1.71E-03           | 9                       | 64                     | OTOF,MYO3B,WNT5A,FRZB,SLC17A8,ATP2B2,GABRB2,NTRK3,EPHA4                                                                                                                                                                                            |
| GO:0034765 | regulation of ion transmembrane transport                        | 1.71E-03           | 31                      | 687                    | ENPP1,KCNIP1,FABP5,CACNG3,SCN3A,CCL2,KCNK6,KCNK13,AZIN1,CNKSR3,AOC3,OCN,PRSS8,HECW1,CXCL10,KCNB1,KCNC1,NFE2L2,KCNJ2,ABCC8,GLP1R,KCNQ3,CACNA1G,SHANK1,CACNA1C,GRB10,GRIN1,KCNG3,GRM5,RGS2,TNF                                                       |
| GO:0006935 | chemotaxis                                                       | 1.71E-03           | 36                      | 870                    | RPS6KA5,LGR4,LRTM2,WNT4,LTB4R2,CHN1,PGF,SEMA3A,CCL2,CYP7B1,GPNMB,MMP14,CXCL12,VEGFA,COL6A3,SEMA4B,WNT5A,CXCL14,CRMP1,SEMA3E,CXCL10,SMOC2,GFRA2,CMTM8,NEC-TIN1,NGFR,KDR,CNTN2,CLXN,NTRK3,GRB10,CXCL1,LGALS3,CMTM7,CDH13,EPHA4                       |
| GO:0034762 | regulation of transmembrane transport                            | 1.71E-03           | 31                      | 691                    | ENPP1,KCNIP1,FABP5,CACNG3,SCN3A,CCL2,KCNK6,KCNK13,AZIN1,CNKSR3,AOC3,OCN,PRSS8,HECW1,CXCL10,KCNB1,KCNC1,NFE2L2,KCNJ2,ABCC8,GLP1R,KCNQ3,CACNA1G,SHANK1,CACNA1C,GRB10,GRIN1,KCNG3,GRM5,RGS2,TNF                                                       |
| GO:0048839 | inner ear development                                            | 1.71E-03           | 21                      | 363                    | GRXCR1,OTOF,MYO3B,FGFR2,PLS1,WNT5A,CXCL14,CELSR1,DACH2,FRZB,SLC17A8,ATP2B2,GABRB2,MYCN,BCR,MAFB,DLX3,NTRK3,GSC,ADGRG6,EPHA4                                                                                                                        |
| GO:0007169 | transmembrane receptor protein tyrosine kinase signaling pathway | 1.80E-03           | 36                      | 880                    | EPS15,CRIM1,RPS6KA5,ENPP1,WNT4,CHN1,PGF,FZD4,TYRO3,AP3S1,CCL2,ATP6V1C2,FGFR2,VEGFA,WNT5A,TXNIP,IGFBP2,RASSF2,SREBF1,FSTL4,SMOC2,BCR,GFRA2,NGFR,KDR,NTRK3,GRB10,NR1H3,GRIN1,ARPC1B,EIF4EBP1,LTK,REPS2,HCK,CDH13,EPHA4                               |
| GO:0050918 | positive chemotaxis                                              | 2.22E-03           | 10                      | 90                     | PGF,GPNMB,CXCL12,VEGFA,WNT5A,CXCL10,KDR,NTRK3,LGALS3,CDH13                                                                                                                                                                                         |
| GO:0042330 | taxis                                                            | 2.22E-03           | 36                      | 903                    | RPS6KA5,LGR4,LRTM2,WNT4,LTB4R2,CHN1,PGF,SEMA3A,CCL2,CYP7B1,GPNMB,MMP14,CXCL12,VEGFA,COL6A3,SEMA4B,WNT5A,CXCL14,CRMP1,SEMA3E,CXCL10,SMOC2,GFRA2,CMTM8,NEC-TIN1,NGFR,KDR,CNTN2,CLXN,NTRK3,GRB10,CXCL1,LGALS3,CMTM7,CDH13,EPHA4                       |
| GO:0048841 | regulation of axon extension involved in axon guidance           | 2.22E-03           | 7                       | 39                     | WNT4,SEMA3A,CXCL12,VEGFA,SEMA4B,WNT5A,SEMA3E                                                                                                                                                                                                       |

|            |                                                       |          |    |     |                                                                                                                                                                                                                                         |
|------------|-------------------------------------------------------|----------|----|-----|-----------------------------------------------------------------------------------------------------------------------------------------------------------------------------------------------------------------------------------------|
| GO:0030335 | positive regulation of cell migration                 | 2.22E-03 | 30 | 684 | ACVR1,PGF,SEMA3A,RIN2,CCL2,GPNMB,MMP14,CXCL12,VEGFA,ONE-CUT2,SEMA4B,WNT5A,CXCL14,FAM83H,MAPRE1,AOC3,SEMA3E,HDAC9,MYLK,CXCL10,DAB2,SMOC2,NFE2L2,SPHK1,KDR,NTRK3,GRIN1,LGALS3,TNF,CDH13                                                   |
| GO:0048812 | neuron projection morphogenesis                       | 2.74E-03 | 37 | 961 | PRMT8,RPS6KA5,LGR4,LRTM2,WNT4,CHN1,RNF157,FZD4,SEMA3A,S100B,FGFR2,MMP14,CXCL12,VEGFA,COL6A3,SEMA4B,WNT5A,PPFIA2,SLITRK3,CRMP1,SLITRK5,AUTS2,SEMA3E,HECW1,SRRM4,FSTL4,GFRA2,NECTIN1,NGFR,KDR,CNTN2,SHANK1,NTRK3,GRB10,GRI N1,LZTS1,EPHA4 |
| GO:0051272 | positive regulation of cellular component movement    | 2.74E-03 | 31 | 733 | ACVR1,PGF,SEMA3A,RIN2,CCL2,GPNMB,MMP14,CXCL12,VEGFA,ONE-CUT2,SEMA4B,WNT5A,CXCL14,FAM83H,MAPRE1,AOC3,SEMA3E,HDAC9,MYLK,CXCL10,DAB2,BCL6,SMOC2,NFE2L2,SPHK1,KDR,NTRK3,GRIN1,LGALS3,TNF,CDH13                                              |
| GO:0043583 | ear development                                       | 2.74E-03 | 21 | 393 | GRXCR1,OTOF,MYO3B,FGFR2,PLS1,WNT5A,CXCL14,CELSR1,DACH2,FRZB,SLC17A8,ATP2B2,GABRB2,MYCN,BCR,MAFB,DLX3,NTRK3,GSC,ADGRG6,EPHA4                                                                                                             |
| GO:0010721 | negative regulation of cell development               | 2.74E-03 | 16 | 245 | SEMA3A,VEGFA,SEMA4B,WNT5A,FRZB,SEMA3E,MYCN,FSTL4,BRINP1,ABCC8,NGFR,NPPC,NTRK3,S1PR3,TNF,EPHA4                                                                                                                                           |
| GO:0061138 | morphogenesis of a branching epithelium               | 2.86E-03 | 16 | 247 | LGR4,WNT4,ACVR1,PGF,SEMA3A,FGFR2,MMP14,CXCL12,VEGFA,WNT5A,CELSR1,SEMA3E,MYCN,KDR,TNF,CSDM1                                                                                                                                              |
| GO:0120039 | plasma membrane bounded cell projection morphogenesis | 3.15E-03 | 37 | 977 | PRMT8,RPS6KA5,LGR4,LRTM2,WNT4,CHN1,RNF157,FZD4,SEMA3A,S100B,FGFR2,MMP14,CXCL12,VEGFA,COL6A3,SEMA4B,WNT5A,PPFIA2,SLITRK3,CRMP1,SLITRK5,AUTS2,SEMA3E,HECW1,SRRM4,FSTL4,GFRA2,NECTIN1,NGFR,KDR,CNTN2,SHANK1,NTRK3,GRB10,GRI N1,LZTS1,EPHA4 |
| GO:2000147 | positive regulation of cell motility                  | 3.15E-03 | 30 | 713 | ACVR1,PGF,SEMA3A,RIN2,CCL2,GPNMB,MMP14,CXCL12,VEGFA,ONE-CUT2,SEMA4B,WNT5A,CXCL14,FAM83H,MAPRE1,AOC3,SEMA3E,HDAC9,MYLK,CXCL10,DAB2,SMOC2,NFE2L2,SPHK1,KDR,NTRK3,GRIN1,LGALS3,TNF,CDH13                                                   |
| GO:0048858 | cell projection morphogenesis                         | 3.49E-03 | 37 | 984 | PRMT8,RPS6KA5,LGR4,LRTM2,WNT4,CHN1,RNF157,FZD4,SEMA3A,S100B,FGFR2,MMP14,CXCL12,VEGFA,COL6A3,SEMA4B,WNT5A,PPFIA2,SLITRK3,CRMP1,SLITRK5,AUTS2,SEMA3E,HECW1,SRRM4,FSTL4,GFRA2,NECTIN1,NGFR,KDR,CNTN2,SHANK1,NTRK3,GRB10,GRI N1,LZTS1,EPHA4 |
| GO:0048545 | response to steroid hormone                           | 3.86E-03 | 26 | 582 | CDKN1A,ACVR1,S100B,CCL2,CYP7B1,VEGFA,WNT5A,AQP4,TXNIP,IGFBP2,PRSS8,SREBF1,DAB2,BCL3,PTGDS,GPR83,SPHK1,CACNA1G,MGARP,ABHD2,NTRK3,NR1H3,CXCL1,LMNB1,EIF4EBP1,TNF                                                                          |
| GO:0003013 | circulatory system process                            | 3.86E-03 | 33 | 838 | SLC24A3,KCNIP1,FABP5,CACNG3,SEMA3A,ADRA1A,HEG1,KCNK6,CXCL12,VEGFA,SLC13A3,MYZAP,CCM2L,P2RX2,AOC3,OCLN,ATP2A3,ATP2B2,CXCL10,SREB                                                                                                         |

|            |                                                                    |          |    |     |                                                                                                                                                                                                                 |
|------------|--------------------------------------------------------------------|----------|----|-----|-----------------------------------------------------------------------------------------------------------------------------------------------------------------------------------------------------------------|
|            |                                                                    |          |    |     | F1,BCR,KCNJ2,ABCC8,GLP1R,CACNA1G,AG-TRAP,CACNA1C,NPPC,RGS2,SLC7A3,P2RY1,TNF,EPAS1                                                                                                                               |
| GO:0040017 | positive regulation of locomotion                                  | 4.51E-03 | 30 | 734 | ACVR1,PGF,SEMA3A,RIN2,CCL2,GPNMB,MMP14,CXCL12,VEGFA,ONE-CUT2,SEMA4B,WNT5A,CXCL14,FAM83H,MAPRE1,AOC3,SEMA3E,HDAC9,MYLK,CXCL10,DAB2,SMOC2,NFE2L2,SPHK1,KDR,NTRK3,GRIN1,LGALS3,TNF,CDH13                           |
| GO:0010975 | regulation of neuron projection development                        | 4.64E-03 | 27 | 627 | CHN1,SEMA3A,CXCL12,CREB3L2,VEGFA,SEMA4B,WNT5A,PPFIA2,CRMP1,STYXL1,SEMA3E,HECW1,DAB2,FSTL4,DGKG,GFAP,NFE2L2,SPHK1,NGFR,CNTN2,NEU4,NTRK3,GRIN1,RGS2,LZTS1,LTK,EPHA4                                               |
| GO:0034330 | cell junction organization                                         | 5.63E-03 | 34 | 899 | LRTM2,WNT4,HEG1,PKP1,FGFR2,MMP14,VEGFA,WNT5A,PPFIA2,SLITRK3,P2RX2,SLITRK5,OCLN,ATP2B2,SEMA3E,GABRB2,MYLK,THSD1,BCR,LIN7B,ABCC8,NECTIN1,KDR,MARVELD3,CNTN2,SHANK1,NTRK3,GRIN1,GRM5,TNF,RASSF8,CDH13,PHLDB2,EPHA4 |
| GO:0001763 | morphogenesis of a branching structure                             | 5.63E-03 | 16 | 270 | LGR4,WNT4,ACVR1,PGF,SEMA3A,FGFR2,MMP14,CXCL12,VEGFA,WNT5A,CELSR1,SEMA3E,MYCN,KDR,TNF,CSMD1                                                                                                                      |
| GO:1902284 | neuron projection extension involved in neuron projection guidance | 5.92E-03 | 7  | 51  | WNT4,SEMA3A,CXCL12,VEGFA,SEMA4B,WNT5A,SEMA3E                                                                                                                                                                    |
| GO:0048846 | axon extension involved in axon guidance                           | 5.92E-03 | 7  | 51  | WNT4,SEMA3A,CXCL12,VEGFA,SEMA4B,WNT5A,SEMA3E                                                                                                                                                                    |
| GO:0030516 | regulation of axon extension                                       | 6.60E-03 | 11 | 138 | WNT4,SEMA3A,CXCL12,VEGFA,SEMA4B,WNT5A,SEMA3E,FSTL4,CNTN2,NTRK3,EPHA4                                                                                                                                            |
| GO:0050927 | positive regulation of positive chemotaxis                         | 6.69E-03 | 6  | 36  | PGF,CXCL12,VEGFA,KDR,NTRK3,CDH13                                                                                                                                                                                |
| GO:0009611 | response to wounding                                               | 7.13E-03 | 34 | 919 | CDKN1A,WNT4,FABP5,TYRO3,SCN3A,CCL2,FGFR2,CXCL12,CREB3L2,VEGFA,WNT5A,CELSR1,CCM2L,P2RX2,PRKAR2A,OCLN,MYLK,DGKG,SMOC2,GFAP,NFE2L2,ABCC8,NGFR,KDR,CNTN2,ABHD2,DOCK9,NTRK3,CXCL1,P2RX3,P2RY1,TNF,PHLDB2,EPHA4       |
| GO:0050926 | regulation of positive chemotaxis                                  | 7.21E-03 | 6  | 37  | PGF,CXCL12,VEGFA,KDR,NTRK3,CDH13                                                                                                                                                                                |
| GO:0048675 | axon extension                                                     | 7.21E-03 | 13 | 194 | WNT4,SEMA3A,CXCL12,VEGFA,COL6A3,SEMA4B,WNT5A,AUTS2,SEMA3E,FSTL4,CNTN2,NTRK3,EPHA4                                                                                                                               |
| GO:0007409 | axonogenesis                                                       | 7.41E-03 | 29 | 732 | RPS6KA5,LGR4,LRTM2,WNT4,CHN1,SEMA3A,S100B,FGFR2,MMP14,CXCL12,VEGFA,COL6A3,SEMA4B,WNT5A,SLITRK3,CRMP1,SLITRK5,AUTS2,SEMA3E,SRRM4,FSTL4,GFRA2,NECTIN1,NGFR,CNTN2,NTRK3,GRB10,GRIN1,EPHA4                          |
| GO:0008016 | regulation of heart contraction                                    | 7.69E-03 | 17 | 315 | KCNIP1,CACNG3,SEMA3A,ADRA1A,KCNK6,VEGFA,ATP2A3,ATP2B2,SREBF1,KCNJ2,GLP1R,CACNA1G,CACNA1C,NPPC,RGS2,TNF,EPAS1                                                                                                    |
| GO:0034329 | cell junction assembly                                             | 7.83E-03 | 23 | 517 | LRTM2,WNT4,HEG1,PKP1,MMP14,VEGFA,WNT5A,SLITRK3,SLITRK5,OCLN,GABRB2,MYLK,THSD1,BCR,LIN7B,NECTIN1,KDR,MARVELD3,SHANK1,NTRK3,GRIN1,TNF,PHLDB2                                                                      |

|            |                                                                    |          |    |     |                                                                                                                                                                                                   |
|------------|--------------------------------------------------------------------|----------|----|-----|---------------------------------------------------------------------------------------------------------------------------------------------------------------------------------------------------|
| GO:0042391 | regulation of membrane potential                                   | 7.95E-03 | 24 | 554 | KCNIP1,CACNG3,ADRA1A,SCN3A,PIP5KL1,KCNK6,KCNK13,P2RX2,GABRB2,KCNB1,KCNC1,KCNJ2,NGFR,KCNQ3,KDR,CACNA1G,SHANK1,CACNA1C,NTRK3,GRIN1,IGSF11,GRM5,P2RX3,TNF                                            |
| GO:1901653 | cellular response to peptide                                       | 7.98E-03 | 24 | 556 | ENPP1,TLR6,AP3S1,CCL2,ATP6V1C2,PRKAR2A,PNPLA3,HDAC9,SREBF1,NFE2L2,KLF5,GLP1R,NGFR,MGAR,AG-TRAP,CACNA1C,RAB31,GRB10,NR1H3,GRIN1,GRM5,CCND2,EIF4EBP1,EPHA4                                          |
| GO:0046660 | female sex differentiation                                         | 7.98E-03 | 13 | 199 | WNT4,FZD4,TYRO3,MMP14,MMP19,VEGFA,WNT5A,ACVR1C,DACH2,KDR,CAPN5,CCND2,CSMD1                                                                                                                        |
| GO:0042471 | ear morphogenesis                                                  | 9.02E-03 | 13 | 202 | GRXCR1,MYO3B,FGFR2,PLS1,WNT5A,CELSR1,FRZB,ATP2B2,BCR,MAFB,DLX3,GSC,ADGRG6                                                                                                                         |
| GO:0031344 | regulation of cell projection organization                         | 1.03E-02 | 33 | 911 | CHN1,FZD4,SEMA3A,MYO3B,PLS1,CXCL12,CREB3L2,VEGFA,SEMA4B,WNT5A,PPFIA2,CRMP1,AUTS2,STYXL1,OCLN,SEMA3E,HECW1,DAB2,FSTL4,DGKG,GFAP,NFE2L2,SPHK1,KLF5,NGFR,CNTN2,NEU4,NTRK3,GRIN1,RGS2,LZTS1,LTK,EPHA4 |
| GO:0007411 | axon guidance                                                      | 1.03E-02 | 20 | 427 | RPS6KA5,LGR4,LRTM2,WNT4,CHN1,SEMA3A,MMP14,CXCL12,VEGFA,COL6A3,SEMA4B,WNT5A,CRMP1,SEMA3E,GFRA2,NEC-TIN1,NGFR,CNTN2,GRB10,EPHA4                                                                     |
| GO:0097485 | neuron projection guidance                                         | 1.03E-02 | 20 | 428 | RPS6KA5,LGR4,LRTM2,WNT4,CHN1,SEMA3A,MMP14,CXCL12,VEGFA,COL6A3,SEMA4B,WNT5A,CRMP1,SEMA3E,GFRA2,NEC-TIN1,NGFR,CNTN2,GRB10,EPHA4                                                                     |
| GO:1901888 | regulation of cell junction assembly                               | 1.03E-02 | 14 | 236 | LRTM2,WNT4,MMP14,VEGFA,WNT5A,SLITRK3,SLITRK5,OCLN,NEC-TIN1,KDR,NTRK3,GRIN1,TNF,PHLDB2                                                                                                             |
| GO:1903959 | regulation of anion transmembrane transport                        | 1.03E-02 | 11 | 152 | ENPP1,FABP5,AZIN1,AOC3,OCLN,NFE2L2,GLP1R,GRB10,GRM5,RGS2,TNF                                                                                                                                      |
| GO:0042472 | inner ear morphogenesis                                            | 1.12E-02 | 12 | 181 | GRXCR1,MYO3B,FGFR2,PLS1,WNT5A,CELSR1,FRZB,ATP2B2,BCR,MAFB,DLX3,ADGRG6                                                                                                                             |
| GO:0048511 | rhythmic process                                                   | 1.12E-02 | 20 | 433 | LGR4,FZD4,TYRO3,CYP7B1,MMP19,ENOX2,MAGEL2,WNT5A,BHLHE40,AZIN1,NMS,SREBF1,PTGDS,GDF10,NGFR,ZPBP2,CAPN5,NTRK3,NR1H3,GRIN1                                                                           |
| GO:0090596 | sensory organ morphogenesis                                        | 1.26E-02 | 23 | 544 | GRXCR1,MYO3B,FGFR2,MMP14,PLS1,VEGFA,SFRP5,WNT5A,AQP5,CELSR1,FRZB,ATP2B2,MYLK,BCL6,BCR,PROM1,NECTIN1,KDR,MAFB,DLX3,GSC,ADGRG6,EPHA4                                                                |
| GO:0090066 | regulation of anatomical structure size                            | 1.30E-02 | 26 | 657 | WNT4,SEMA3A,ADRA1A,MYO3B,PLS1,CXCL12,VEGFA,SEMA4B,MAGEL2,WNT5A,AQP4,SLC12A7,ATP2B2,SEMA3E,FSTL4,CACNA1G,CNTN2,CACNA1C,NPPC,NTRK3,RGS2,ARPC1B,P2RY1,TNF,HCK,EPHA4                                  |
| GO:0120035 | regulation of plasma membrane bounded cell projection organization | 1.30E-02 | 32 | 891 | CHN1,SEMA3A,MYO3B,PLS1,CXCL12,CREB3L2,VEGFA,SEMA4B,WNT5A,PPFIA2,CRMP1,AUTS2,STYXL1,OCLN,SEMA3E,HECW1,DAB2,FSTL4,DGKG,GFAP,NFE2L2,SPHK1,KLF5,NGFR,CNTN2,NEU4,NTRK3,GRIN1,RGS2,LZTS1,LTK,EPHA4      |
| GO:0033198 | response to ATP                                                    | 1.44E-02 | 6  | 45  | CCL2,CIB2,P2RX2,SPHK1,P2RX3,P2RY1                                                                                                                                                                 |
| GO:0061387 | regulation of extent of cell growth                                | 1.47E-02 | 11 | 161 | WNT4,SEMA3A,CXCL12,VEGFA,SEMA4B,WNT5A,SEMA3E,FSTL4,CNTN2,NTRK3,EPHA4                                                                                                                              |
| GO:0050768 | negative regulation of neurogenesis                                | 1.47E-02 | 12 | 189 | SEMA3A,SEMA4B,WNT5A,SEMA3E,MYCN,FSTL4,BRINP1,ABCC8,NGFR,NTRK3,TNF,EPHA4                                                                                                                           |

|            |                                                   |          |    |     |                                                                                                                                                                                        |
|------------|---------------------------------------------------|----------|----|-----|----------------------------------------------------------------------------------------------------------------------------------------------------------------------------------------|
| GO:0060047 | heart contraction                                 | 1.48E-02 | 19 | 412 | KCNIP1,CACNG3,SEMA3A,ADRA1A,KCNK6,VEGFA,MYZAP,CCM2L,ATP2A3,ATP2B2,SREBF1,KCNJ2,GLP1R,CACNA1G,CACNA1C,NPPC,RGS2,TNF,EPAS1                                                               |
| GO:0031960 | response to corticosteroid                        | 1.48E-02 | 17 | 345 | CDKN1A,ACVR1,S100B,CCL2,VEGFA,WNT5A,AQP4,IGFBP2,PRSS8,PTGDS,GPR83,CACNA1G,NTRK3,CXCL1,LMNB1,EIF4EBP1,TNF                                                                               |
| GO:0043506 | regulation of JUN kinase activity                 | 1.53E-02 | 9  | 111 | TLR6,FZD4,MAP3K9,SFRP5,WNT5A,MAPKBP1,DAB2,TNF,EPHA4                                                                                                                                    |
| GO:0051384 | response to glucocorticoid                        | 1.53E-02 | 16 | 314 | CDKN1A,ACVR1,S100B,CCL2,VEGFA,WNT5A,AQP4,IGFBP2,PTGDS,GPR83,CACNA1G,NTRK3,CXCL1,LMNB1,EIF4EBP1,TNF                                                                                     |
| GO:0050770 | regulation of axonogenesis                        | 1.61E-02 | 13 | 222 | CHN1,SEMA3A,CXCL12,VEGFA,SEMA4B,WNT5A,SEMA3E,FSTL4,NGFR,CNTN2,NTRK3,GRIN1,EPHA4                                                                                                        |
| GO:0016053 | organic acid biosynthetic process                 | 1.66E-02 | 18 | 385 | SDSL,FABP5,ACSL3,CYP7B1,PLOD2,MTHFR,GAD2,ACSM1,SREBF1,PTGDS,ELOVL2,GGT1,OSBPL2,HPGDS,SPHK1,ABHD2,NR1H3,LDHA                                                                            |
| GO:0001952 | regulation of cell-matrix adhesion                | 1.66E-02 | 10 | 139 | WNT4,RIN2,MMP14,VEGFA,ONECUT2,SEMA3E,BCL6,KDR,CDH13,PHLDB2                                                                                                                             |
| GO:0008015 | blood circulation                                 | 1.66E-02 | 28 | 755 | KCNIP1,CACNG3,SEMA3A,ADRA1A,KCNK6,CXCL12,VEGFA,MYZAP,CCM2L,P2RX2,AOC3,OCN,ATP2A3,ATP2B2,CXCL10,SREBF1,BCR,KCNJ2,ABCC8,GLP1R,CACNA1G,AGTRAP,CACNA1C,NPPC,RGS2,P2RY1,TNF,EPAS1           |
| GO:0051961 | negative regulation of nervous system development | 1.66E-02 | 12 | 195 | SEMA3A,SEMA4B,WNT5A,SEMA3E,MYCN,FSTL4,BRINP1,ABCC8,NGFR,NTRK3,TNF,EPHA4                                                                                                                |
| GO:0003015 | heart process                                     | 1.66E-02 | 19 | 421 | KCNIP1,CACNG3,SEMA3A,ADRA1A,KCNK6,VEGFA,MYZAP,CCM2L,ATP2A3,ATP2B2,SREBF1,KCNJ2,GLP1R,CACNA1G,CACNA1C,NPPC,RGS2,TNF,EPAS1                                                               |
| GO:0043410 | positive regulation of MAPK cascade               | 1.66E-02 | 25 | 641 | TLR6,FZD4,SEMA3A,ADRA1A,MAP3K9,CCL2,FGFR2,GPNMB,PRXL2C,CXCL12,VEGFA,WNT5A,MAPKBP1,RASSF2,DAB2,SPHK1,NGFR,KDR,NTRK3,GRM5,TFF2,LMNB1,P2RY1,TNF,EPHA4                                     |
| GO:1990138 | neuron projection extension                       | 1.66E-02 | 14 | 256 | WNT4,RNF157,SEMA3A,CXCL12,VEGFA,COL6A3,SEMA4B,WNT5A,AUTS2,SEMA3E,FSTL4,CNTN2,NTRK3,EPHA4                                                                                               |
| GO:0061564 | axon development                                  | 1.66E-02 | 29 | 797 | RPS6KA5,LGR4,LRTM2,WNT4,CHN1,SEMA3A,S100B,FGFR2,MMP14,CXCL12,VEGFA,COL6A3,SEMA4B,WNT5A,SLITRK3,CRMP1,SLITRK5,AUTS2,SEMA3E,SRRM4,FSTL4,GFRA2,NECTIN1,NGFR,CNTN2,NTRK3,GRB10,GRIN1,EPHA4 |
| GO:0008361 | regulation of cell size                           | 1.68E-02 | 14 | 257 | WNT4,SEMA3A,CXCL12,VEGFA,SEMA4B,WNT5A,AQP4,SLC12A7,ATP2B2,SEMA3E,FSTL4,CNTN2,NTRK3,EPHA4                                                                                               |
| GO:0043507 | positive regulation of JUN kinase activity        | 1.69E-02 | 8  | 91  | TLR6,FZD4,MAP3K9,WNT5A,MAPKBP1,DAB2,TNF,EPHA4                                                                                                                                          |
| GO:0071300 | cellular response to retinoic acid                | 1.80E-02 | 8  | 92  | FZD4,CCL2,FGFR2,WNT5A,BRINP3,BRINP1,NTRK3,LTN                                                                                                                                          |
| GO:0030308 | negative regulation of cell growth                | 1.91E-02 | 13 | 231 | CDKN1A,ENPP1,SEMA3A,SEMA4B,WNT5A,FRZB,VGLL4,SEMA3E,DAB2,FSTL4,BCL6,RGS2,EPHA4                                                                                                          |
| GO:0046683 | response to organophosphorus                      | 1.91E-02 | 12 | 201 | ENPP1,CCL2,CYP7B1,MMP19,CIB2,P2RX2,SREBF1,SPHK1,LDHA,CCND2,P2RX3,P2RY1                                                                                                                 |
| GO:0098656 | anion transmembrane transport                     | 1.91E-02 | 24 | 614 | ENPP1,SLC24A3,FABP5,MFSD4A,SLC13A3,SLC7A14,AZIN1,AOC3,SLC17A8,OCN,SLC12A7,ANO3,GABRB2,BCR,GFAP,NFE2L2,GLP1R,SLC25A21,GRB10,GRM5,RGS2,SLC7A3,SLC16A3,TNF                                |

|            |                                                         |          |    |     |                                                                                                                                                                                          |
|------------|---------------------------------------------------------|----------|----|-----|------------------------------------------------------------------------------------------------------------------------------------------------------------------------------------------|
| GO:0007160 | cell-matrix adhesion                                    | 1.91E-02 | 14 | 263 | WNT4,RIN2,MMP14,VEGFA,ONE-CUT2,PPFIA2,SEMA3E,BCL6,THSD1,BCR,KDR,CNTN2,CDH13,PHLDB2                                                                                                       |
| GO:0044057 | regulation of system process                            | 1.91E-02 | 29 | 810 | KCNIP1,FABP5,CACNG3,SEMA3A,S100B,ADRA1A,KCNK6,VEGFA,ATP2A3,ATP2B2,SREBF1,DAB2,SPHK1,KCNJ2,ABCC8,GLP1R,NGFR,CACNA1G,SHANK1,CACNA1C,NPPC,NR1H3,GRIN1,IGSF11,RGS2,TFF2,P2RX3,TNF,EPAS1      |
| GO:0099177 | regulation of trans-synaptic signaling                  | 1.91E-02 | 26 | 692 | FABP5,CACNG3,S100B,ADRA1A,CCL2,PPFIA2,BHLHE40,P2RX2,PRKAR2A,ATP2B2,BCR,GFAP,KCNB1,SPHK1,NGFR,KDR,CNTN2,SHANK1,GRIN1,IGSF11,GRM5,P2RX3,P2RY1,LZTS1,TNF,EPHA4                              |
| GO:0045596 | negative regulation of cell differentiation             | 1.91E-02 | 31 | 891 | CRIM1,ENPP1,WNT4,SEMA3A,S100B,VEGFA,SEMA4B,WNT5A,CXCL14,FRZB,SEMA3E,MYCN,CXCL10,FSTL4,BRINP1,BCL6,GDF10,NFE2L2,KLF5,ABCC8,NGFR,MAFB,CNTN2,NPPC,NTRK3,NR1H3,PRAMEF12,RGS2,S1PR3,TNF,EPHA4 |
| GO:0046545 | development of primary female sexual characteristics    | 1.98E-02 | 11 | 174 | WNT4,FZD4,MMP14,MMP19,VEGFA,ACVR1C,DACH2,KDR,CAPN5,CCND2,CSMD1                                                                                                                           |
| GO:0019932 | second-messenger-mediated signaling                     | 1.99E-02 | 26 | 696 | LGR4,RNF157,ADRA1A,CCL2,VEGFA,MT1A,P2RX2,PRKAR2A,CXCL10,SPHK1,GLP1R,KDR,CACNA1C,NPPC,GPR17,GRIN1,GRM5,RGS2,S1PR3,TFF2,ADGRG6,P2RX3,P2RY1,TNF,RXFP1,CDH13                                 |
| GO:1905603 | regulation of blood-brain barrier permeability          | 1.99E-02 | 3  | 8   | VEGFA,OCLN,ABCC8                                                                                                                                                                         |
| GO:0002687 | positive regulation of leukocyte migration              | 1.99E-02 | 11 | 175 | PGF,CCL2,MMP14,CXCL12,VEGFA,WNT5A,CXCL14,AOC3,CXCL10,LGALS3,TNF                                                                                                                          |
| GO:0048640 | negative regulation of developmental growth             | 1.99E-02 | 10 | 148 | CDKN1A,SEMA3A,SEMA4B,WNT5A,IGFBP2,VGLL4,SEMA3E,FSTL4,RGS2,EPHA4                                                                                                                          |
| GO:0001525 | angiogenesis                                            | 1.99E-02 | 30 | 859 | ACVR1,PGF,SEMA3A,CCL2,FGFR2,GPNMB,MMP14,MMP19,CXCL12,VEGFA,WNT5A,IGFBP2,SEMA3E,HADC9,CXCL10,DAB2,SMOC2,NFE2L2,SPHK1,KLF5,ABCC8,NGFR,KDR,RALB,CXCL1,LGALS3,ADGRG6,TNF,EPAS1,CDH13         |
| GO:0003018 | vascular process in circulatory system                  | 1.99E-02 | 16 | 334 | SLC24A3,FABP5,ADRA1A,VEGFA,SLC13A3,OCLN,ATP2A3,BCR,ABCC8,CACNA1G,CACNA1C,NPPC,RGS2,SLC7A3,P2RY1,TNF                                                                                      |
| GO:0050921 | positive regulation of chemotaxis                       | 1.99E-02 | 11 | 177 | PGF,CCL2,CXCL12,VEGFA,WNT5A,CXCL14,CXCL10,SMOC2,KDR,NTRK3,CDH13                                                                                                                          |
| GO:1900721 | positive regulation of uterine smooth muscle relaxation | 1.99E-02 | 2  | 2   | ABCC8,NPPC                                                                                                                                                                               |
| GO:1900719 | regulation of uterine smooth muscle relaxation          | 1.99E-02 | 2  | 2   | ABCC8,NPPC                                                                                                                                                                               |
| GO:1901551 | negative regulation of endothelial cell development     | 1.99E-02 | 2  | 2   | VEGFA,S1PR3                                                                                                                                                                              |
| GO:0044558 | uterine smooth muscle relaxation                        | 1.99E-02 | 2  | 2   | ABCC8,NPPC                                                                                                                                                                               |
| GO:1903141 | negative regulation of                                  | 1.99E-02 | 2  | 2   | VEGFA,S1PR3                                                                                                                                                                              |



|            |                                                  |          |    |     |                                                                                                                                                                                    |
|------------|--------------------------------------------------|----------|----|-----|------------------------------------------------------------------------------------------------------------------------------------------------------------------------------------|
|            | establishment of endothelial barrier             |          |    |     |                                                                                                                                                                                    |
| GO:0048638 | regulation of developmental growth               | 2.03E-02 | 20 | 476 | CDKN1A,WNT4,RNF157,SEMA3A,FGFR2,PLS1,CXCL12,VEGFA,SEMA4B,WNT5A,IGFBP2,VGLL4,SEMA3E,FSTL4,CNTN2,CACNA1C,NPPC,NTRK3,RGS2,EPHA4                                                       |
| GO:0051960 | regulation of nervous system development         | 2.04E-02 | 24 | 626 | LRTM2,SEMA3A,S100B,CXCL12,VEGFA,SEMA4B,WNT5A,SLITRK3,BHLHE40,SLITRK5,SEMA3E,MYCN,RNF112,FSTL4,BRINP1,GFAP,ABCC8,NGFR,KDR,CNTN2,NTRK3,GRM5,TNF,EPHA4                                |
| GO:0035637 | multicellular organismal signaling               | 2.16E-02 | 13 | 240 | KCNIP1,CACNG3,SCN3A,KCNK6,P2RX2,ATP2A3,ATP2B2,KCNJ2,CACNA1G,CACNA1C,NPPC,NTRK3,P2RX3                                                                                               |
| GO:0035590 | purinergic nucleotide receptor signaling pathway | 2.32E-02 | 5  | 36  | P2RX2,P2RY13,CNTN2,P2RX3,P2RY1                                                                                                                                                     |
| GO:1901652 | response to peptide                              | 2.32E-02 | 28 | 792 | ENPP1,TLR6,AP3S1,CCL2,ATP6V1C2,CXCL12,ACVR1C,PRKAR2A,PNPLA3,HDAC9,PRSS8,SREBF1,NFE2L2,KLF5,ABCC8,GLP1R,NGFR,MGARP,AGTRAP,CACNA1C,RAB31,GRB10,NR1H3,GRIN1,GRM5,CCND2,EIF4EBP1,EPHA4 |
| GO:0001508 | action potential                                 | 2.32E-02 | 12 | 212 | KCNIP1,CACNG3,ADRA1A,SCN3A,P2RX2,KCNB1,KCNJ2,CACNA1G,CACNA1C,NTRK3,P2RX3,TNF                                                                                                       |
| GO:0030517 | negative regulation of axon extension            | 2.32E-02 | 6  | 55  | SEMA3A,SEMA4B,WNT5A,SEMA3E,FSTL4,EPHA4                                                                                                                                             |
| GO:0050919 | negative chemotaxis                              | 2.32E-02 | 6  | 55  | LGR4,LRTM2,SEMA3A,SEMA4B,WNT5A,SEMA3E                                                                                                                                              |
| GO:0046394 | carboxylic acid biosynthetic process             | 2.34E-02 | 17 | 377 | FABP5,ACSL3,CYP7B1,PLOD2,MTHFR,GAD2,ACSM1,SREBF1,PTGDS,ELOVL2,GGT1,OSBPL2,HPGDS,SPHK1,ABHD2,NR1H3,LDHA                                                                             |
| GO:0030324 | lung development                                 | 2.41E-02 | 14 | 277 | HEG1,FGFR2,MMP14,VEGFA,WNT5A,SIM2,CELSR1,MYCN,SREBF1,KDR,EIF4EBP1,TNF,RXFP1,EPAS1                                                                                                  |
| GO:0006874 | cellular calcium ion homeostasis                 | 2.41E-02 | 22 | 561 | SLC24A3,S100B,ADRA1A,CCL2,CXCL12,CIB2,WNT5A,P2RX2,ATP2A3,ATP2B2,CXCL10,GLP1R,KDR,CACNA1G,CACNA1C,GPR17,GRIN1,GRM5,CXCL1,S1PR3,P2RX3,P2RY1                                          |
| GO:0090036 | regulation of protein kinase C signaling         | 2.47E-02 | 4  | 21  | ADRA1A,VEGFA,WNT5A,DGKG                                                                                                                                                            |
| GO:0072503 | cellular divalent inorganic cation homeostasis   | 2.47E-02 | 23 | 601 | SLC24A3,S100B,ADRA1A,CCL2,CXCL12,CIB2,WNT5A,MT1A,P2RX2,ATP2A3,ATP2B2,CXCL10,GLP1R,KDR,CACNA1G,CACNA1C,GPR17,GRIN1,GRM5,CXCL1,S1PR3,P2RX3,P2RY1                                     |
| GO:0045926 | negative regulation of growth                    | 2.57E-02 | 15 | 313 | CDKN1A,ENPP1,SEMA3A,SEMA4B,WNT5A,MT1A,IGFBP2,FRZB,VGLL4,SEMA3E,DAB2,FSTL4,BCL6,RGS2,EPHA4                                                                                          |
| GO:0050920 | regulation of chemotaxis                         | 2.57E-02 | 14 | 280 | PGF,SEMA3A,CCL2,CXCL12,VEGFA,SEMA4B,WNT5A,CXCL14,SEMA3E,CXCL10,SMOC2,KDR,NTRK3,CDH13                                                                                               |
| GO:0031589 | cell-substrate adhesion                          | 2.57E-02 | 18 | 418 | WNT4,FZD4,TYRO3,RIN2,MMP14,VEGFA,ONECUT2,PPFIA2,SEMA3E,DAB2,BCL6,THSD1,SMOC2,BCCR,KDR,CNTN2,CDH13,PHLDB2                                                                           |
| GO:1904646 | cellular response to amyloid-beta                | 2.57E-02 | 6  | 57  | TLR6,NGFR,CACNA1C,GRIN1,GRM5,EPHA4                                                                                                                                                 |
| GO:0043408 | regulation of MAPK cascade                       | 2.57E-02 | 30 | 884 | TLR6,FZD4,SEMA3A,ADRA1A,MAP3K9,CCL2,FGFR2,GPNMB,PRXL2C,CXCL12,VEGFA,SFRP5,WNT5A,CNK                                                                                                |

|            |                                                       |          |    |     |                                                                                                                                                            |
|------------|-------------------------------------------------------|----------|----|-----|------------------------------------------------------------------------------------------------------------------------------------------------------------|
|            |                                                       |          |    |     | SR3,MAP-KBP1,RASSF2,DAB2,SPHK1,NGFR,KDR,MARVELD3,NTRK3,PRAMEF12,GRM5,RGS2,TFF2,LMNB1,P2RY1,TNF,EPHA4                                                       |
| GO:0030323 | respiratory tube development                          | 2.57E-02 | 14 | 281 | HEG1,FGFR2,MMP14,VEGFA,WNT5A,SIM2,CELSR1,MYCN,SREBF1,KDR,EIF4EBP1,TNF,RXFP1,EPAS1                                                                          |
| GO:0048588 | developmental cell growth                             | 2.67E-02 | 16 | 350 | WNT4,RNF157,SEMA3A,ADRA1A,CXCL12,VEGFA,COL6A3,SEMA4B,WNT5A,AUTS2,SEMA3E,FSTL4,CNTN2,NTRK3,RGS2,EPHA4                                                       |
| GO:0051593 | response to folic acid                                | 2.75E-02 | 4  | 22  | MGMT,MOG,VEGFA,MTHFR                                                                                                                                       |
| GO:0060562 | epithelial tube morphogenesis                         | 2.75E-02 | 22 | 572 | LGR4,WNT4,ACVR1,PGF,SEMA3A,FGFR2,MMP14,CXCL12,VEGFA,SFRP5,WNT5A,CELSR1,MTHFR,SEMA3E,MYCN,CXCL10,KDR,DLX3,CACNA1C,TNF,CSMD1,EPHA4                           |
| GO:0071677 | positive regulation of mononuclear cell migration     | 2.75E-02 | 7  | 81  | CCL2,CXCL12,WNT5A,CXCL14,CXCL10,LGALS3,TNF                                                                                                                 |
| GO:0034764 | positive regulation of transmembrane transport        | 2.75E-02 | 14 | 285 | CACNG3,CCL2,AZIN1,CNKSR3,AOC3,OCLN,PRSS8,CXCL10,KCNC1,NFE2L2,KCNJ2,ABCC8,GLP1R,CACNA1C                                                                     |
| GO:0034767 | positive regulation of ion transmembrane transport    | 2.75E-02 | 14 | 285 | CACNG3,CCL2,AZIN1,CNKSR3,AOC3,OCLN,PRSS8,CXCL10,KCNC1,NFE2L2,KCNJ2,ABCC8,GLP1R,CACNA1C                                                                     |
| GO:0060541 | respiratory system development                        | 2.75E-02 | 15 | 319 | HEG1,FGFR2,MMP14,VEGFA,WNT5A,SIM2,CELSR1,MYCN,SREBF1,KDR,DLX3,EIF4EBP1,TNF,RXFP1,EPAS1                                                                     |
| GO:0002053 | positive regulation of mesenchymal cell proliferation | 2.75E-02 | 5  | 39  | FGFR2,VEGFA,WNT5A,MYCN,KDR                                                                                                                                 |
| GO:0050804 | modulation of chemical synaptic transmission          | 2.75E-02 | 25 | 691 | CACNG3,S100B,ADRA1A,CCL2,PPFIA2,BHLHE40,P2RX2,PRKAR2A,ATP2B2,BCR,GFAP,KCNB1,SPHK1,NGFR,KDR,CNTN2,SHANK1,GRIN1,IGSF11,GRM5,P2RX3,P2RY1,LZTS1,TNF,EPHA4      |
| GO:0001667 | ameboidal-type cell migration                         | 2.75E-02 | 25 | 691 | WNT4,ACVR1,LTB4R2,SEMA3A,HMCN2,RIN2,MMP14,CXCL12,VEGFA,SEMA4B,WNT5A,ACVR1C,CELSR1,SH3PXD2A,SEMA3E,HDAC9,SMOC2,NFE2L2,KDR,MARVELD3,IGSF11,LPP,TNF,LTK,CDH13 |
| GO:0010810 | regulation of cell-substrate adhesion                 | 2.75E-02 | 13 | 253 | WNT4,FZD4,RIN2,MMP14,VEGFA,ONECUT2,SEMA3E,DAB2,BCL6,SMOC2,KDR,CDH13,PHLDB2                                                                                 |
| GO:0001569 | branching involved in blood vessel morphogenesis      | 2.75E-02 | 6  | 59  | ACVR1,SEMA3A,CXCL12,VEGFA,SEMA3E,KDR                                                                                                                       |
| GO:0033552 | response to vitamin B3                                | 2.75E-02 | 3  | 10  | FABP5,CCL2,PMP2                                                                                                                                            |
| GO:0010977 | negative regulation of neuron projection development  | 2.75E-02 | 11 | 191 | SEMA3A,SEMA4B,WNT5A,CRMP1,SEMA3E,DAB2,FSTL4,GFAP,NGFR,NEU4,EPHA4                                                                                           |
| GO:0061042 | vascular wound healing                                | 2.94E-02 | 4  | 23  | VEGFA,SMOC2,KDR,TNF                                                                                                                                        |
| GO:0060284 | regulation of cell development                        | 2.99E-02 | 25 | 697 | SEMA3A,CXCL12,VEGFA,SEMA4B,WNT5A,BHLHE40,FRZB,SEMA3E,MYCN,HDAC9,RNF112,DAB2,FSTL4,BRINP1,GFAP,ABCC8,NGFR,KDR,CNTN2,NPPC,NTRK3,GRM5,S1PR3,TNF,EPHA4         |

|            |                                                         |          |    |     |                                                                                                                                                              |
|------------|---------------------------------------------------------|----------|----|-----|--------------------------------------------------------------------------------------------------------------------------------------------------------------|
| GO:1903522 | regulation of blood circulation                         | 3.02E-02 | 17 | 394 | KCNIP1,CACNG3,SEMA3A,ADRA1A,KCNK6,VEGFA,ATP2A3,ATP2B2,SREBF1,KCNJ2,GLP1R,CACNA1G,CACNA1C,NPPC,RGS2,TNF,EPAS1                                                 |
| GO:0055074 | calcium ion homeostasis                                 | 3.09E-02 | 22 | 582 | SLC24A3,S100B,ADRA1A,CCL2,CXCL12,CIB2,WNT5A,P2RX2,ATP2A3,ATP2B2,CXCL10,GLP1R,KDR,CACNA1G,CACNA1C,GPR17,GRIN1,GRM5,CXCL1,S1PR3,P2RX3,P2RY1                    |
| GO:0050771 | negative regulation of axonogenesis                     | 3.09E-02 | 7  | 84  | SEMA3A,SEMA4B,WNT5A,SEMA3E,FSTL4,NGFR,EPHA4                                                                                                                  |
| GO:0032570 | response to progesterone                                | 3.09E-02 | 7  | 84  | CCL2,VEGFA,TXNIP,SREBF1,SPHK1,ABHD2,NR1H3                                                                                                                    |
| GO:0051928 | positive regulation of calcium ion transport            | 3.09E-02 | 10 | 165 | CCL2,CXCL12,P2RX2,ATP2B2,MYLK,CXCL10,CACNA1C,GRIN1,LGALS3,P2RX3                                                                                              |
| GO:1903034 | regulation of response to wounding                      | 3.17E-02 | 12 | 227 | WNT4,CCL2,CXCL12,OCLN,MYLK,SMOC2,NFE2L2,ABCC8,NTRK3,TNF,PHLDB2,EPHA4                                                                                         |
| GO:0071318 | cellular response to ATP                                | 3.27E-02 | 4  | 24  | CCL2,CIB2,P2RX3,P2RY1                                                                                                                                        |
| GO:0032787 | monocarboxylic acid metabolic process                   | 3.29E-02 | 26 | 745 | PDK1,PFKL,FABP5,ACSL3,CKM,CYP7B1,PRXL2C,PNPLA3,CYB5A,GAD2,AUH,ACSM1,SREBF1,PTGDS,ELOVL2,GGT1,OSBPL2,HPGDS,SPHK1,SLC27A3,ABHD2,NR1H3,LDHA,SLC7A3,SLC16A3,ENO2 |
| GO:0010827 | regulation of glucose transmembrane transport           | 3.31E-02 | 8  | 111 | ENPP1,FABP5,AOC3,OCLN,NFE2L2,GLP1R,GRB10,TNFR                                                                                                                |
| GO:0090037 | positive regulation of protein kinase C signaling       | 3.38E-02 | 3  | 11  | ADRA1A,VEGFA,WNT5A                                                                                                                                           |
| GO:0008585 | female gonad development                                | 3.39E-02 | 10 | 168 | WNT4,FZD4,MMP14,MMP19,VEGFA,ACVR1C,KDR,CAPN5,CCND2,CSMD1                                                                                                     |
| GO:0071805 | potassium ion transmembrane transport                   | 3.40E-02 | 12 | 230 | SLC24A3,KCNIP1,KCNK6,KCNT1,KCNK13,SLC12A7,KCNB1,KCNC1,KCNJ2,ABCC8,KCNQ3,KCNG3                                                                                |
| GO:0072330 | monocarboxylic acid biosynthetic process                | 3.43E-02 | 13 | 263 | FABP5,ACSL3,CYP7B1,ACSM1,SREBF1,PTGDS,ELOVL2,OSBPL2,HPGDS,SPHK1,ABHD2,NR1H3,LDHA                                                                             |
| GO:0031279 | regulation of cyclase activity                          | 3.46E-02 | 14 | 297 | LGR4,LTB4R2,ADRA1A,CXCL10,P2RY13,GLP1R,CACNA1C,RCVRN,RGS2,S1PR3,ADGRG6,P2RY1,RXFP1,RD3                                                                       |
| GO:0072507 | divalent inorganic cation homeostasis                   | 3.55E-02 | 23 | 632 | SLC24A3,S100B,ADRA1A,CCL2,CXCL12,CIB2,WNT5A,MT1A,P2RX2,ATP2A3,ATP2B2,CXCL10,GLP1R,KDR,CACNA1G,CACNA1C,GPR17,GRIN1,GRM5,CXCL1,S1PR3,P2RX3,P2RY1               |
| GO:0001558 | regulation of cell growth                               | 3.55E-02 | 21 | 555 | CDKN1A,ENPP1,WNT4,RNF157,SEMA3A,MMP14,CXCL12,VEGFA,SEMA4B,WNT5A,FRZB,VGLL4,SEMA3E,DAB2,FSTL4,BCL6,SPHK1,CNTN2,NTRK3,RGS2,EPHA4                               |
| GO:1905604 | negative regulation of blood-brain barrier permeability | 3.55E-02 | 2  | 3   | VEGFA,ABCC8                                                                                                                                                  |
| GO:1901082 | positive regulation of relaxation of smooth muscle      | 3.55E-02 | 2  | 3   | ABCC8,NPPC                                                                                                                                                   |
| GO:0032349 | positive regulation of aldosterone biosynthetic process | 3.55E-02 | 2  | 3   | WNT4,DAB2                                                                                                                                                    |

|            |                                                      |          |    |     |                                                                                                                                                                                   |
|------------|------------------------------------------------------|----------|----|-----|-----------------------------------------------------------------------------------------------------------------------------------------------------------------------------------|
| GO:0032346 | positive regulation of aldosterone metabolic process | 3.55E-02 | 2  | 3   | WNT4,DAB2                                                                                                                                                                         |
| GO:0014074 | response to purine-containing compound               | 3.55E-02 | 12 | 233 | ENPP1,CCL2,CYP7B1,MMP19,CIB2,P2RX2,SREBF1,SPHK1,LDHA,CCND2,P2RX3,P2RY1                                                                                                            |
| GO:0046777 | protein autophosphorylation                          | 3.55E-02 | 13 | 266 | ENPP1,TYRO3,MYO3B,MAP3K9,FGFR2,GPNMB,VEGFA,RASSF2,BCR,GFRA2,KDR,HCK,EPHA4                                                                                                         |
| GO:0042074 | cell migration involved in gastrulation              | 3.55E-02 | 7  | 88  | WNT4,ACVR1,MMP14,CXCL12,WNT5A,CELSR1,LPP                                                                                                                                          |
| GO:0050767 | regulation of neurogenesis                           | 3.55E-02 | 20 | 518 | SEMA3A,CXCL12,VEGFA,SEMA4B,WNT5A,BHLHE40,SEMA3E,MYCN,RNF112,FSTL4,BRINP1,GFAP,ABCC8,NGFR,KDR,CNTN2,NTRK3,GRM5,TNF,EPHA4                                                           |
| GO:0040008 | regulation of growth                                 | 3.55E-02 | 29 | 879 | CDKN1A,ENPP1,WNT4,RNF157,SEMA3A,FGFR2,MM P14,PLS1,CXCL12,VEGFA,ENOX2,SEMA4B,WNT5A,M T1A,IGFBP2,FRZB,VGLL4,SEMA3E,DAB2,FSTL4,BCL6,SPHK1,CNTN2,CACNA1C,NPPC,NTRK3,IGSF11,RGS2,EPHA4 |
| GO:0051339 | regulation of lyase activity                         | 3.62E-02 | 14 | 301 | LGR4,LTB4R2,ADRA1A,CXCL10,P2RY13,GLP1R,CACNA1C,RCVRN,RGS2,S1PR3,ADGRG6,P2RY1,RXFP1,RD3                                                                                            |
| GO:0032535 | regulation of cellular component size                | 3.62E-02 | 19 | 482 | WNT4,SEMA3A,MYO3B,PLS1,CXCL12,VEGFA,SEMA4B,MAGEL2,WNT5A,AQP4,SLC12A7,ATP2B2,SEMA3E,FSTL4,CNTN2,NTRK3,ARPC1B,HCK,EPHA4                                                             |
| GO:0048562 | embryonic organ morphogenesis                        | 3.62E-02 | 23 | 637 | CRIM1,GRXCR1,WNT4,ACVR1,MYO3B,FGFR2,MMP14,PLS1,SFRP5,WNT5A,CELSR1,FRZB,ATP2B2,MYCN,BCR,MAFB,DLX3,CACNA1C,NR1H3,GSC,AD-GRG6,EPHA4,DCAF7                                            |
| GO:0060688 | regulation of morphogenesis of a branching structure | 3.62E-02 | 6  | 65  | LGR4,PGF,FGFR2,VEGFA,WNT5A,TNF                                                                                                                                                    |
| GO:0032963 | collagen metabolic process                           | 3.63E-02 | 9  | 143 | WNT4,CCL2,MMP10,MMP14,MMP19,PLOD2,SERPINB7,NPPC,P3H2                                                                                                                              |
| GO:0044283 | small molecule biosynthetic process                  | 3.66E-02 | 27 | 800 | SDSL,ENPP1,WNT4,FABP5,ACSL3,CYP7B1,PLOD2,AMPD3,MTHFR,GAD2,ACSM1,SREBF1,DAB2,PTGDS,ELOVL2,GGT1,OSBP1L2,HPGDS,SPHK1,ABHD2,NTHL1,NR1H3,LDHA,P2RY1,TNF,PCBD1,ENO2                     |
| GO:0042060 | wound healing                                        | 3.86E-02 | 24 | 681 | CDKN1A,WNT4,TYRO3,CCL2,FGFR2,VEGFA,WNT5A,CELSR1,CCM2L,P2RX2,PRKAR2A,OCLN,MYLK,DGKG,SMOC2,NFE2L2,ABCC8,KDR,DOCK9,CXCL1,P2RX3,P2RY1,TNF,PHLDB2                                      |
| GO:0035249 | synaptic transmission, glutamatergic                 | 3.94E-02 | 8  | 117 | CACNG3,CCL2,SLC17A8,NGFR,SHANK1,GRIN1,GRM5,TNF                                                                                                                                    |
| GO:0009612 | response to mechanical stimulus                      | 3.94E-02 | 16 | 376 | ENPP1,OTOF,CCL2,MMP14,CXCL12,CIB2,TXNIP,IGFBP2,ATP2B2,ANO3,CXCL10,KCNC1,KCNJ2,P2RX3,P2RY1,TNF                                                                                     |
| GO:0090075 | relaxation of muscle                                 | 3.99E-02 | 5  | 45  | KCNJ2,ABCC8,NPPC,RGS2,P2RY1                                                                                                                                                       |
| GO:0040013 | negative regulation of locomotion                    | 4.02E-02 | 18 | 451 | WNT4,SEMA3A,PIP5KL1,CCL2,CXCL12,SEMA4B,WNT5A,ACVR1C,SEMA3E,BCR,NFE2L2,ABCC8,NGFR,MARVELD3,ABHD2,GRM5,TNF,PHLDB2                                                                   |
| GO:0016049 | cell growth                                          | 4.02E-02 | 24 | 685 | CDKN1A,ENPP1,WNT4,RNF157,SEMA3A,ADRA1A,MMP14,CXCL12,VEGFA,COL6A3,SEMA4B,WNT5A,FRZB,AUTS2,VGLL4,SEMA3E,DAB2,FSTL4,BCL6,SPHK1,CNTN2,NTRK3,RGS2,EPHA4                                |

|            |                                                                 |          |    |     |                                                                                                                                                                                               |
|------------|-----------------------------------------------------------------|----------|----|-----|-----------------------------------------------------------------------------------------------------------------------------------------------------------------------------------------------|
| GO:0032870 | cellular response to hormone stimulus                           | 4.02E-02 | 29 | 891 | ENPP1,LGR4,ACVR1,PGF,AP3S1,CCL2,CYP7B1,ATP6V1C2,PLOD2,VEGFA,IGFBP2,PRKAR2A,PNPLA3,HDAC9,SREBF1,DAB2,NFE2L2,GLP1R,CACNA1G,MGARP,AGTRAP,RAB31,ABHD2,GRB10,NR1H3,CCND2,LMNB1,EIF4EBP1,RXFP1      |
| GO:0070098 | chemokine-mediated signaling pathway                            | 4.14E-02 | 7  | 92  | CCL2,CXCL12,ACKR1,CXCL10,GPR17,CXCL1,TFF2                                                                                                                                                     |
| GO:1904659 | glucose transmembrane transport                                 | 4.14E-02 | 9  | 147 | ENPP1,FABP5,MFSD4A,AOC3,OCN,NFE2L2,GLP1R,GRB10,TNF                                                                                                                                            |
| GO:0006665 | sphingolipid metabolic process                                  | 4.29E-02 | 10 | 178 | GBA3,B3GALT2,SERINC2,ELOVL2,SPHK1,ZPBP2,NEU4,SPTSSB,TNF,LARGE1                                                                                                                                |
| GO:0032526 | response to retinoic acid                                       | 4.29E-02 | 10 | 178 | FZD4,CCL2,FGFR2,WNT5A,IGFBP2,BRINP3,SREBF1,BRINP1,NTRK3,LYN                                                                                                                                   |
| GO:0007610 | behavior                                                        | 4.37E-02 | 30 | 940 | GCNT4,FZD4,S100B,CYP7B1,CXCL12,MTMR12,CIB2,BHLHE40,CELSR1,P2RX2,AOC3,SLIT1,TRK5,AUTS2,ATP2B2,NMS,BRINP1,PTGDS,HPGDS,ABCC8,GLP1R,CNTN2,SHANK1,CACNA1C,GRIN1,GRM5,CCND2,P2RX3,P2RY1,CSMD1,EPHA4 |
| GO:0060191 | regulation of lipase activity                                   | 4.42E-02 | 11 | 211 | ADRA1A,FGFR2,VEGFA,ARL1,HDAC9,GPR17,NTRK3,NR1H3,GRM5,RGS2,P2RY1                                                                                                                               |
| GO:0009313 | oligosaccharide catabolic process                               | 4.42E-02 | 3  | 13  | MANBA,GBA3,NEU4                                                                                                                                                                               |
| GO:0014832 | urinary bladder smooth muscle contraction                       | 4.42E-02 | 3  | 13  | P2RX2,CACNA1C,P2RX3                                                                                                                                                                           |
| GO:0060601 | lateral sprouting from an epithelium                            | 4.42E-02 | 3  | 13  | FGFR2,WNT5A,CELSR1                                                                                                                                                                            |
| GO:0019371 | cyclooxygenase pathway                                          | 4.42E-02 | 3  | 13  | PTGDS,HPGDS,SPHK1                                                                                                                                                                             |
| GO:0048041 | focal adhesion assembly                                         | 4.42E-02 | 7  | 94  | WNT4,MMP14,VEGFA,THSD1,BCR,KDR,PHLDB2                                                                                                                                                         |
| GO:0010464 | regulation of mesenchymal cell proliferation                    | 4.42E-02 | 5  | 47  | FGFR2,VEGFA,WNT5A,MYCN,KDR                                                                                                                                                                    |
| GO:1903960 | negative regulation of anion transmembrane transport            | 4.42E-02 | 5  | 47  | ENPP1,FABP5,GRB10,RGS2,TNF                                                                                                                                                                    |
| GO:0048843 | negative regulation of axon extension involved in axon guidance | 4.42E-02 | 4  | 28  | SEMA3A,SEMA4B,WNT5A,SEMA3E                                                                                                                                                                    |
| GO:0008645 | hexose transmembrane transport                                  | 4.42E-02 | 9  | 150 | ENPP1,FABP5,MFSD4A,AOC3,OCN,NFE2L2,GLP1R,GRB10,TNF                                                                                                                                            |
| GO:0048880 | sensory system development                                      | 4.48E-02 | 29 | 903 | FABP5,FZD4,SEMA3A,FGFR2,MMP14,CXCL12,VEGFA,PMP2,CIB2,SFRP5,WNT5A,AQP5,SLC7A14,SH3PXD2A,SLC17A8,ATP2B2,MYLK,BCL6,PROM1,NECTIN1,NGFR,KDR,DLX3,CACNA1C,NTRK3,NR1H3,ADGRG6,EPHA4,RD3              |
| GO:0015749 | monosaccharide transmembrane transport                          | 4.79E-02 | 9  | 152 | ENPP1,FABP5,MFSD4A,AOC3,OCN,NFE2L2,GLP1R,GRB10,TNF                                                                                                                                            |
| GO:0048247 | lymphocyte chemotaxis                                           | 4.86E-02 | 6  | 71  | CCL2,CYP7B1,CXCL12,WNT5A,CXCL14,CXCL10                                                                                                                                                        |

|            |                                                |          |    |     |                                                                                                                                                                                         |
|------------|------------------------------------------------|----------|----|-----|-----------------------------------------------------------------------------------------------------------------------------------------------------------------------------------------|
| GO:1904645 | response to amyloid-beta                       | 4.86E-02 | 6  | 71  | TLR6,NGFR,CACNA1C,GRIN1,GRM5,EPHA4                                                                                                                                                      |
| GO:0061061 | muscle structure development                   | 4.87E-02 | 31 | 995 | CDKN1A,WNT4,ACVR1,S100B,ADRA1A,HEG1,FGFR2,MMP14,PLOD2,CXCL12,HSPB2,VEGFA,COL6A3,MTMR12,WNT5A,CXCL14,CCM2L,P2RX2,HDAC9,MYLK,VAMP5,CXCL10,DAB2,KLF5,NGFR,TA-GLN,GSC,RGS2,TNF,EPAS1,LARGE1 |
| GO:0048569 | post-embryonic animal organ development        | 4.87E-02 | 4  | 29  | GRXCR1,VEGFA,KDR,LDHA                                                                                                                                                                   |
| GO:2000241 | regulation of reproductive process             | 4.96E-02 | 12 | 249 | ZFP57,WNT4,SEMA3A,VEGFA,WNT5A,ACVR1C,PRKAR2A,PTGDS,HPGDS,NPPC,CLXN,P2RY1                                                                                                                |
| GO:0031667 | response to nutrient levels                    | 4.97E-02 | 25 | 744 | CDKN1A,WNT4,FABP5,ACSL3,MGMT,CCL2,MOG,VEGFA,PMP2,ACVR1C,IGFBP2,MTHFR,PNPLA3,CXCL10,SREBF1,KCNB1,NFE2L2,SPHK1,RALB,NR1H3,LDHA,CXCL1,TBL1XR1,KPTN,EIF4EBP1                                |
| GO:0060560 | developmental growth involved in morphogenesis | 5.00E-02 | 16 | 391 | WNT4,RNF157,SEMA3A,FGFR2,CXCL12,VEGFA,COL6A3,SEMA4B,SFRP5,WNT5A,AUTS2,SEMA3E,FSTL4,CNTN2,NTRK3,EPHA4                                                                                    |

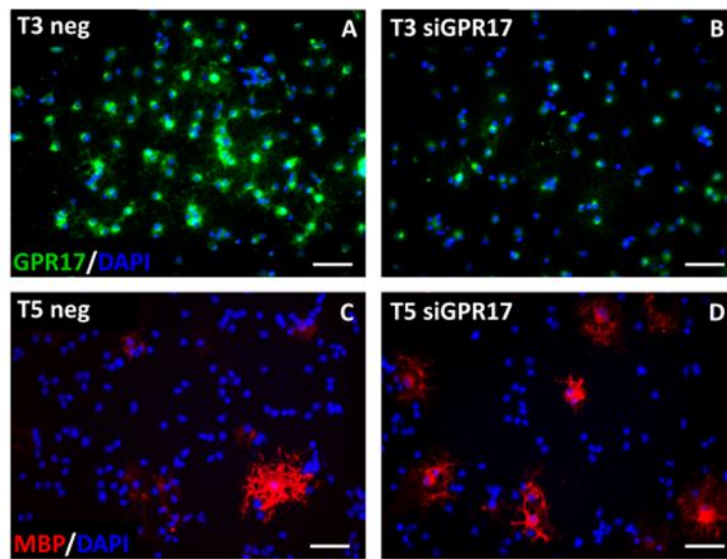

**Figure S2. Effect of GPR17 silencing on OPC maturation.** Representative pictures at 20X magnification showing GPR17- (in green at T3) and MBP- (in red at T5) positive cells in control OPC cultures (A, C) and after GPR17 silencing (B, D). In blue, staining of cell nuclei. Scale bar: 50µm.

**Table S3. Descriptive tables of metabolomic analysis.** The tables show the fold changes (and the relative p-values) of all metabolites, calculated comparing their abundance in GPR17-silenced versus control OPCs at DID 1 (A), DID 2 (B), DID 3 (C), DID 5 (D). Fisher's LSD corrected by FDR; p.adj<0.1.

| A) Metabolic profile siGPR17 vs neg - DID 1 |                  |          |            |           |
|---------------------------------------------|------------------|----------|------------|-----------|
| Metabolite                                  | Fold change (FC) | log2(FC) | p.adjusted | -log10(p) |
| Arg                                         | 1.5669           | 0.64787  | 0.24121    | 0.61761   |
| Lys                                         | 1.5184           | 0.60257  | 0.24121    | 0.61761   |
| C14-Carnitine                               | 0.71517          | -0.48363 | 0.24121    | 0.61761   |
| Ac-Ornithine                                | 1.5126           | 0.59706  | 0.39615    | 0.40214   |
| Ornithine                                   | 1.397            | 0.48229  | 0.39615    | 0.40214   |
| Gln                                         | 1.3139           | 0.39382  | 0.39615    | 0.40214   |
| Asp                                         | 1.1185           | 0.16156  | 0.39615    | 0.40214   |
| His                                         | 1.5922           | 0.67106  | 0.48651    | 0.31291   |
| 3-phosphoglycerate/2-phosphoglycerate       | 1.3396           | 0.42175  | 0.48651    | 0.31291   |
| C16-Carnitine                               | 0.76188          | -0.39237 | 0.48651    | 0.31291   |
| Citrate                                     | 1.3036           | 0.38255  | 0.48651    | 0.31291   |
| Glucose                                     | 1.2668           | 0.34121  | 0.48651    | 0.31291   |
| Glu                                         | 1.1932           | 0.25486  | 0.48651    | 0.31291   |
| C5-Carnitine                                | 0.85511          | -0.22581 | 0.48651    | 0.31291   |
| Fumarate                                    | 0.87218          | -0.1973  | 0.48651    | 0.31291   |
| Sedoheptulose phosphate                     | 0.89787          | -0.15542 | 0.48651    | 0.31291   |
| C181-Carnitine                              | 0.68481          | -0.54622 | 0.48989    | 0.3099    |
| Tyr                                         | 1.2852           | 0.36197  | 0.48989    | 0.3099    |
| Noraepinephrine                             | 1.2672           | 0.34162  | 0.48989    | 0.3099    |
| Thr                                         | 1.2602           | 0.3336   | 0.48989    | 0.3099    |
| Val                                         | 1.2361           | 0.30577  | 0.48989    | 0.3099    |
| Trp                                         | 1.2269           | 0.295    | 0.48989    | 0.3099    |
| Ser                                         | 1.1863           | 0.24642  | 0.48989    | 0.3099    |
| Alpha Keto glutarate                        | 0.88437          | -0.17727 | 0.48989    | 0.3099    |
| Asn                                         | 1.3242           | 0.40517  | 0.49705    | 0.3036    |
| Phosphoenolpyruvate                         | 1.4067           | 0.49229  | 0.50118    | 0.30001   |
| Met                                         | 1.4038           | 0.48937  | 0.50118    | 0.30001   |
| Phe                                         | 1.2802           | 0.35636  | 0.50118    | 0.30001   |
| 6-phosphoglycerate                          | 1.1617           | 0.21629  | 0.50118    | 0.30001   |
| Sarcosine                                   | 1.1607           | 0.21503  | 0.50118    | 0.30001   |
| Ile                                         | 1.1557           | 0.2088   | 0.50118    | 0.30001   |
| Gly                                         | 1.1424           | 0.19211  | 0.50118    | 0.30001   |
| Glucose-6P                                  | 1.0711           | 0.099107 | 0.50118    | 0.30001   |
| Leu                                         | 1.1658           | 0.22133  | 0.59992    | 0.22191   |
| DHAP/GAP                                    | 1.1357           | 0.18361  | 0.59992    | 0.22191   |
| C3-Carnitine                                | 0.91217          | -0.13262 | 0.59992    | 0.22191   |
| C180-Carnitine                              | 1.1344           | 0.18195  | 0.60313    | 0.21959   |
| Creatine                                    | 1.1497           | 0.20125  | 0.68598    | 0.16369   |
| Pro                                         | 1.1227           | 0.16696  | 0.68598    | 0.16369   |
| Met-SO                                      | 1.1057           | 0.14491  | 0.68598    | 0.16369   |
| Ala                                         | 1.1033           | 0.14186  | 0.68598    | 0.16369   |
| Succinate                                   | 1.0885           | 0.12232  | 0.68598    | 0.16369   |
| Carnosine                                   | 1.0774           | 0.1076   | 0.68598    | 0.16369   |

|                       |         |           |         |          |
|-----------------------|---------|-----------|---------|----------|
| Malate                | 0.95966 | -0.059401 | 0.68598 | 0.16369  |
| C10-Carnitine         | 1.3893  | 0.47431   | 0.68766 | 0.16262  |
| Acetyl coA            | 0.92512 | -0.11228  | 0.68766 | 0.16262  |
| Lactate               | 0.94969 | -0.074465 | 0.68766 | 0.16262  |
| Erythrose 4-Phosphate | 1.0468  | 0.065976  | 0.68766 | 0.16262  |
| Free Carnitine        | 0.96315 | -0.054166 | 0.68766 | 0.16262  |
| Ribulose 5P/R5P       | 1.0332  | 0.047173  | 0.68766 | 0.16262  |
| AMP                   | 0.96845 | -0.046249 | 0.68766 | 0.16262  |
| C2-Carnitine          | 1.0356  | 0.050455  | 0.75479 | 0.12217  |
| Taurine               | 1.1171  | 0.15973   | 0.77585 | 0.11022  |
| C4-Carnitine          | 0.98123 | -0.027334 | 0.88398 | 0.053557 |

#### B) Metabolic profile siGPR17 vs neg - DID 2

| Metabolite                            | Fold change (FC) | log2(FC)  | p.adjusted  | -log10(p) |
|---------------------------------------|------------------|-----------|-------------|-----------|
| Glucose                               | 0.64094          | -0.64174  | 0.000075926 | 4.1196    |
| AMP                                   | 1.3256           | 0.40664   | 0.00030108  | 3.5213    |
| Malate                                | 1.2491           | 0.32088   | 0.00039241  | 3.4063    |
| Lactate                               | 0.56559          | -0.82217  | 0.00098907  | 3.0048    |
| Fumarate                              | 1.2502           | 0.32211   | 0.001834    | 2.7366    |
| C4-Carnitine                          | 1.5389           | 0.62193   | 0.0042958   | 2.367     |
| Creatine                              | 0.7045           | -0.50533  | 0.0088659   | 2.0523    |
| C3-Carnitine                          | 1.5965           | 0.6749    | 0.011109    | 1.9543    |
| Ornithine                             | 0.7989           | -0.32391  | 0.015443    | 1.8113    |
| C2-Carnitine                          | 1.3273           | 0.40849   | 0.020606    | 1.686     |
| Ribulose 5P/R5P                       | 1.4967           | 0.5818    | 0.021488    | 1.6678    |
| C5-Carnitine                          | 1.4304           | 0.51639   | 0.040135    | 1.3965    |
| Free Carnitine                        | 1.4356           | 0.52168   | 0.043675    | 1.3598    |
| Citrate                               | 1.2361           | 0.30574   | 0.04464     | 1.3503    |
| C16-Carnitine                         | 1.7101           | 0.77406   | 0.078489    | 1.1052    |
| Met                                   | 1.3457           | 0.42834   | 0.12613     | 0.89917   |
| Ala                                   | 1.3396           | 0.42181   | 0.16137     | 0.79219   |
| Noraepinephrine                       | 0.86348          | -0.21176  | 0.17189     | 0.76474   |
| C181-Carnitine                        | 2.0696           | 1.0494    | 0.18965     | 0.72205   |
| Carnosine                             | 0.8605           | -0.21675  | 0.23186     | 0.63478   |
| 3-phosphoglycerate/2-phosphoglycerate | 1.1392           | 0.18804   | 0.2527      | 0.59739   |
| C14-Carnitine                         | 0.78119          | -0.35626  | 0.28056     | 0.55197   |
| Sarcosine                             | 1.1932           | 0.25481   | 0.29241     | 0.53402   |
| Asp                                   | 1.384            | 0.46882   | 0.30863     | 0.51057   |
| Alpha Keto glutarate                  | 0.94671          | -0.079007 | 0.31431     | 0.50264   |
| Glu                                   | 1.3893           | 0.47441   | 0.31721     | 0.49865   |
| Gly                                   | 1.223            | 0.29041   | 0.32989     | 0.48163   |
| Glucose 6P                            | 0.9208           | -0.11904  | 0.33024     | 0.48118   |
| Thr                                   | 1.1614           | 0.21583   | 0.35812     | 0.44597   |
| Succinate                             | 1.1386           | 0.18726   | 0.35832     | 0.44573   |
| Trp                                   | 1.1291           | 0.17515   | 0.35865     | 0.44533   |
| Pro                                   | 1.1721           | 0.22904   | 0.40805     | 0.38929   |
| C180-Carnitine                        | 1.4078           | 0.49348   | 0.41651     | 0.38038   |
| Sedoheptulose phosphate               | 1.1388           | 0.18754   | 0.41784     | 0.37899   |
| Met-SO                                | 0.88756          | -0.17209  | 0.44566     | 0.35099   |



|                       |         |            |         |          |
|-----------------------|---------|------------|---------|----------|
| Asn                   | 1.0663  | 0.09265    | 0.45868 | 0.33849  |
| Phosphoenolpyruvate   | 1.1728  | 0.22998    | 0.48121 | 0.31767  |
| Ile                   | 1.0641  | 0.089691   | 0.48939 | 0.31034  |
| Tyr                   | 1.0778  | 0.1081     | 0.53206 | 0.27404  |
| Taurine               | 1.1181  | 0.16101    | 0.54403 | 0.26437  |
| Ser                   | 1.0685  | 0.09563    | 0.56625 | 0.24699  |
| Phe                   | 1.0671  | 0.093663   | 0.59044 | 0.22883  |
| Gln                   | 0.93736 | -0.093324  | 0.60493 | 0.2183   |
| Ac-Ornithine          | 1.1035  | 0.14208    | 0.61208 | 0.21319  |
| Val                   | 1.0541  | 0.076001   | 0.66033 | 0.18024  |
| Arg                   | 1.0799  | 0.11083    | 0.74665 | 0.12688  |
| Acetyl coA            | 1.0179  | 0.025591   | 0.77203 | 0.11236  |
| Leu                   | 1.0237  | 0.033738   | 0.78916 | 0.10283  |
| Erythrose 4-Phosphate | 1.0169  | 0.024193   | 0.81143 | 0.090747 |
| 6-phosphoglycerate    | 1.0199  | 0.028392   | 0.90672 | 0.042526 |
| Lys                   | 0.97602 | -0.035013  | 0.91684 | 0.037707 |
| His                   | 0.99172 | -0.012001  | 0.95543 | 0.019801 |
| DHAP/GAP              | 0.99424 | -0.0083384 | 0.95721 | 0.018994 |
| C10-Carnitine         | 1.0151  | 0.021579   | 0.97311 | 0.011839 |

### C) Metabolic profile siGPR17 vs neg - DID 3

| Metabolite                            | Fold change (FC) | log2(FC) | p.adjusted | -log10(p) |
|---------------------------------------|------------------|----------|------------|-----------|
| Lactate                               | 0.30202          | -1.7273  | 8.6478E-07 | 6.0631    |
| Noraepinephrine                       | 0.54447          | -0.87707 | 0.0020744  | 2.6831    |
| Carnosine                             | 0.54482          | -0.87615 | 0.0061389  | 2.2119    |
| C3-Carnitine                          | 1.769            | 0.8229   | 0.077599   | 1.1101    |
| Creatine                              | 0.56479          | -0.82422 | 0.084301   | 1.0742    |
| Met                                   | 2.1241           | 1.0869   | 0.1435     | 0.84315   |
| Phosphoenolpyruvate                   | 2.4505           | 1.2931   | 0.17292    | 0.76215   |
| Asp                                   | 1.5658           | 0.64693  | 0.17292    | 0.76215   |
| Glu                                   | 1.4158           | 0.50164  | 0.17292    | 0.76215   |
| 3-phosphoglycerate/2-phosphoglycerate | 3.0213           | 1.5952   | 0.2346     | 0.62967   |
| Ac-Ornithine                          | 1.8585           | 0.89416  | 0.2346     | 0.62967   |
| His                                   | 1.8531           | 0.88997  | 0.2346     | 0.62967   |
| Free Carnitine                        | 1.6586           | 0.72997  | 0.2346     | 0.62967   |
| Arg                                   | 1.6546           | 0.72649  | 0.2346     | 0.62967   |
| Fumarate                              | 1.6324           | 0.70695  | 0.2346     | 0.62967   |
| Pro                                   | 1.6322           | 0.70678  | 0.2346     | 0.62967   |
| Gly                                   | 1.5508           | 0.63302  | 0.2346     | 0.62967   |
| Phe                                   | 1.5095           | 0.59405  | 0.2346     | 0.62967   |
| Ser                                   | 1.5054           | 0.59013  | 0.2346     | 0.62967   |
| Trp                                   | 1.4962           | 0.58132  | 0.2346     | 0.62967   |
| Tyr                                   | 1.4749           | 0.56057  | 0.2346     | 0.62967   |
| Thr                                   | 1.4691           | 0.55496  | 0.2346     | 0.62967   |
| C14-Carnitine                         | 0.6807           | -0.55491 | 0.2346     | 0.62967   |
| Gln                                   | 1.4064           | 0.49201  | 0.2346     | 0.62967   |
| C2-Carnitine                          | 1.4039           | 0.48946  | 0.2346     | 0.62967   |
| Val                                   | 1.3913           | 0.47643  | 0.2346     | 0.62967   |
| Succinate                             | 0.73163          | -0.45081 | 0.2346     | 0.62967   |

|                         |         |           |         |          |
|-------------------------|---------|-----------|---------|----------|
| Sarcosine               | 1.3627  | 0.44651   | 0.2346  | 0.62967  |
| C4-Carnitine            | 1.3516  | 0.43462   | 0.2346  | 0.62967  |
| Malate                  | 1.2917  | 0.3693    | 0.2346  | 0.62967  |
| Ala                     | 1.2741  | 0.34943   | 0.2346  | 0.62967  |
| Lys                     | 1.4681  | 0.55398   | 0.27777 | 0.55632  |
| Ile                     | 1.4573  | 0.54329   | 0.27777 | 0.55632  |
| Asn                     | 1.3919  | 0.47708   | 0.27777 | 0.55632  |
| C5-Carnitine            | 1.2543  | 0.32691   | 0.27777 | 0.55632  |
| Leu                     | 1.2575  | 0.33054   | 0.2809  | 0.55145  |
| Ribulose 5P/R5P         | 0.88577 | -0.175    | 0.28434 | 0.54616  |
| Citrate                 | 1.367   | 0.45096   | 0.28475 | 0.54554  |
| DHAP/GAP                | 0.83511 | -0.25997  | 0.35457 | 0.4503   |
| Glucose                 | 0.82891 | -0.2707   | 0.38629 | 0.41309  |
| C16-Carnitine           | 1.1907  | 0.25176   | 0.42233 | 0.37435  |
| Sedoheptulose phosphate | 1.1902  | 0.25119   | 0.52125 | 0.28295  |
| Acetyl-coA              | 1.6098  | 0.68689   | 0.5365  | 0.27043  |
| Met-SO                  | 0.85863 | -0.21989  | 0.54374 | 0.26461  |
| C181-Carnitine          | 1.1148  | 0.15673   | 0.58493 | 0.23289  |
| Alpha Keto glutarate    | 1.1203  | 0.16389   | 0.66018 | 0.18034  |
| Glucose-6P              | 0.93438 | -0.097912 | 0.72733 | 0.13827  |
| AMP                     | 0.91331 | -0.13082  | 0.80393 | 0.09478  |
| C10-Carnitine           | 1.1439  | 0.19395   | 0.88426 | 0.053422 |
| Taurine                 | 1.1397  | 0.18867   | 0.88426 | 0.053422 |
| 6-phosphoglycerate      | 1.0818  | 0.11349   | 0.88426 | 0.053422 |
| Erythrose 4-Phosphate   | 0.9662  | -0.049613 | 0.88426 | 0.053422 |
| C180-Carnitine          | 0.96008 | -0.058777 | 0.89718 | 0.04712  |
| Ornithine               | 1.0296  | 0.042145  | 0.89718 | 0.04712  |

#### D) Metabolic profile siGPR17 vs neg - DID 5

| Metabolite                            | Fold change (FC) | log2(FC) | p.adjusted  | -log10(p) |
|---------------------------------------|------------------|----------|-------------|-----------|
| Met-SO                                | 0.45225          | -1.1448  | 2.5192E-10  | 9.5987    |
| Free Carnitine                        | 1.6447           | 0.71781  | 0.000044502 | 4.3516    |
| C3-Carnitine                          | 1.4767           | 0.5624   | 0.00013288  | 3.8765    |
| C4-Carnitine                          | 1.5469           | 0.62934  | 0.00033004  | 3.4814    |
| C181-Carnitine                        | 2.2592           | 1.1758   | 0.00033294  | 3.4776    |
| Taurine                               | 0.56738          | -0.81761 | 0.00040936  | 3.3879    |
| C14-Carnitine                         | 1.7283           | 0.78939  | 0.00062787  | 3.2021    |
| C180-Carnitine                        | 1.5452           | 0.62782  | 0.0018217   | 2.7395    |
| Creatine                              | 0.60387          | -0.7277  | 0.0045399   | 2.343     |
| 3-phosphoglycerate/2-phosphoglycerate | 1.784            | 0.83512  | 0.016678    | 1.7778    |
| Carnosine                             | 0.7412           | -0.43206 | 0.025107    | 1.6002    |
| C2-Carnitine                          | 1.262            | 0.33566  | 0.025501    | 1.5934    |
| Acetyl-coA                            | 0.69708          | -0.5206  | 0.027999    | 1.5529    |
| Citrate                               | 1.4048           | 0.49036  | 0.035297    | 1.4523    |
| DHAP/GAP                              | 1.8446           | 0.88333  | 0.047336    | 1.3248    |
| C5-Carnitine                          | 1.1876           | 0.24807  | 0.055822    | 1.2532    |
| Fumarate                              | 1.8763           | 0.90793  | 0.0782      | 1.1068    |
| Ile                                   | 0.86118          | -0.21561 | 0.082933    | 1.0813    |
| C16-Carnitine                         | 3.196            | 1.6762   | 0.088794    | 1.0516    |
| Ornithine                             | 0.80713          | -0.30913 | 0.11669     | 0.93296   |

|                         |         |           |         |           |
|-------------------------|---------|-----------|---------|-----------|
| Asp                     | 1.2755  | 0.35112   | 0.13326 | 0.87529   |
| Noraepinephrine         | 0.81145 | -0.30142  | 0.14607 | 0.83543   |
| Met                     | 1.2787  | 0.35468   | 0.15318 | 0.8148    |
| Trp                     | 0.88279 | -0.17986  | 0.19033 | 0.72048   |
| Malate                  | 1.2743  | 0.34975   | 0.19952 | 0.70002   |
| Val                     | 0.91916 | -0.12162  | 0.20851 | 0.68087   |
| Ribulose 5P/R5P         | 1.3858  | 0.47073   | 0.20932 | 0.67918   |
| Asn                     | 0.90194 | -0.14889  | 0.23775 | 0.62388   |
| Phosphoenolpyruvate     | 1.4252  | 0.51116   | 0.23994 | 0.61989   |
| Leu                     | 0.88474 | -0.17668  | 0.26953 | 0.56939   |
| Thr                     | 0.89292 | -0.16339  | 0.27457 | 0.56135   |
| Lactate                 | 0.83428 | -0.2614   | 0.31359 | 0.50363   |
| 6-phosphoglycerate      | 1.4613  | 0.54726   | 0.3507  | 0.45506   |
| His                     | 0.9075  | -0.14004  | 0.44938 | 0.34739   |
| Sedoheptulose phosphate | 0.92262 | -0.11619  | 0.4719  | 0.32615   |
| Phe                     | 0.94186 | -0.08641  | 0.55649 | 0.25454   |
| Tyr                     | 0.94255 | -0.085361 | 0.61702 | 0.2097    |
| AMP                     | 1.1468  | 0.19761   | 0.62971 | 0.20086   |
| Glu                     | 0.94322 | -0.084337 | 0.64199 | 0.19247   |
| Erythrose 4-Phosphate   | 0.94781 | -0.077324 | 0.65863 | 0.18136   |
| Ser                     | 1.0311  | 0.044185  | 0.70354 | 0.15271   |
| Alpha Keto glutarate    | 1.0409  | 0.057837  | 0.71053 | 0.14842   |
| Pro                     | 0.97123 | -0.042108 | 0.71559 | 0.14534   |
| Succinate               | 0.94126 | -0.087336 | 0.71803 | 0.14386   |
| C10-Carnitine           | 1.156   | 0.20913   | 0.73442 | 0.13405   |
| Arg                     | 1.0452  | 0.063766  | 0.77756 | 0.10927   |
| Gly                     | 0.98642 | -0.019733 | 0.82943 | 0.081218  |
| Glucose-6P              | 1.032   | 0.045511  | 0.83073 | 0.080539  |
| Glucose                 | 0.98248 | -0.025495 | 0.8878  | 0.051686  |
| Sarcosine               | 1.0125  | 0.017868  | 0.91269 | 0.039675  |
| Gln                     | 1.0134  | 0.019171  | 0.92054 | 0.035957  |
| Ac-Ornithine            | 1.0068  | 0.0097292 | 0.96918 | 0.013596  |
| Ala                     | 0.99729 | -0.003918 | 0.98031 | 0.0086355 |
| Lys                     | 1.0014  | 0.0020421 | 0.99309 | 0.0030118 |

**Figure S3. Effect of AR-C155858 on lactate release.** Lactate abundance in the extracellular space (medium) was measured after treatment of GPR17-silenced (siGPR) and control (neg) OPCs with AR-C155858 (MCT1 IN). Data are presented as mean  $\pm$  SD from 2 independent experiments.

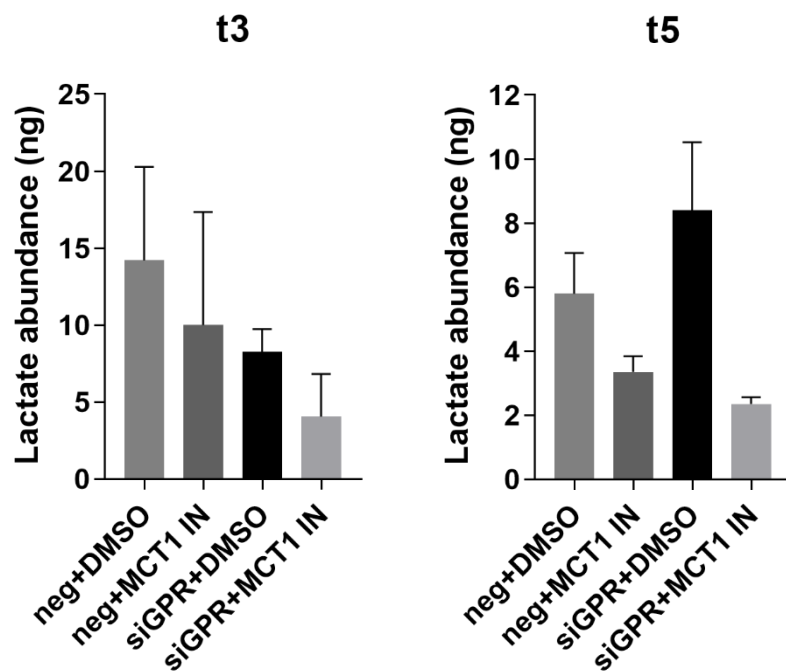

**Table S4. Descriptive tables of lipidomic analysis.** The tables show the fold changes (and the relative p-values) for all lipids, calculated comparing their abundance in GPR17-silenced versus control OPCs at DID 3 (A), DID 5 (B). Fisher's LSD corrected by FDR; p.adj<0.1). PE= phosphatidylethanolamine; PC= phosphatidylcholine; aa= diacyl; ae= acyl-alkyl; SM = sphingomyelin; Cer= ceramide; GCer= Glycosil-ceramide.

| A) Lipidomic profile siGPR17 vs neg - DID 3 |                  |          |            |           |
|---------------------------------------------|------------------|----------|------------|-----------|
| Lipid                                       | Fold change (FC) | log2(FC) | p.adjusted | -LOG10(p) |
| PE aa 34:3                                  | 1.9353           | 0.95256  | 0.042192   | 1.3748    |
| PC aa C40:4                                 | 0.6871           | -0.5414  | 0.076325   | 1.1173    |
| PE aa 32:1                                  | 2.5302           | 1.3393   | 0.11498    | 0.9394    |
| PE aa 32:2                                  | 2.2171           | 1.1487   | 0.11498    | 0.9394    |
| SM C18:0                                    | 1.8389           | 0.87887  | 0.11498    | 0.9394    |
| lysoPC a C24:0                              | 1.6548           | 0.72662  | 0.11498    | 0.9394    |
| lysoPC a C20:3                              | 1.6544           | 0.72629  | 0.11498    | 0.9394    |
| PC aa C40:5                                 | 0.61587          | -0.69929 | 0.11498    | 0.9394    |
| PC aa C42:5                                 | 0.61917          | -0.69158 | 0.11498    | 0.9394    |
| PC aa C38:4                                 | 0.70173          | -0.51102 | 0.11498    | 0.9394    |
| PE aa 40:6                                  | 0.71881          | -0.47633 | 0.11498    | 0.9394    |
| lysoPC a C16:1                              | 2.2121           | 1.1454   | 0.11679    | 0.93261   |
| PE ae 36:1                                  | 1.9432           | 0.95843  | 0.11679    | 0.93261   |
| PC aa C34:2                                 | 1.5971           | 0.67548  | 0.11679    | 0.93261   |
| PC ae C36:2                                 | 1.5466           | 0.62909  | 0.11679    | 0.93261   |
| PE aa 36:3                                  | 1.5363           | 0.6195   | 0.11679    | 0.93261   |
| PE ae 38:4                                  | 0.75718          | -0.40129 | 0.11679    | 0.93261   |
| SM (OH) C22:1                               | 1.5003           | 0.58527  | 0.11901    | 0.92443   |
| PE aa 42:5                                  | 0.60445          | -0.72631 | 0.13668    | 0.86431   |
| PC ae C30:0                                 | 1.6529           | 0.72501  | 0.13668    | 0.86431   |
| lysoPC a C18:2                              | 2.0628           | 1.0446   | 0.14659    | 0.8339    |
| PC ae C42:0                                 | 0.66185          | -0.59542 | 0.14659    | 0.8339    |
| PC aa C42:4                                 | 0.66298          | -0.59296 | 0.14659    | 0.8339    |
| PC aa C32:2                                 | 1.7997           | 0.84773  | 0.15092    | 0.82124   |
| lysoPC a C14:0                              | 2.3788           | 1.2503   | 0.15784    | 0.80178   |
| PC aa C38:5                                 | 0.62678          | -0.67397 | 0.15784    | 0.80178   |
| PC aa C36:4                                 | 0.62728          | -0.67282 | 0.15784    | 0.80178   |
| PC aa C34:3                                 | 1.5729           | 0.65343  | 0.15784    | 0.80178   |
| SM (OH) C16:1                               | 1.5544           | 0.63638  | 0.15784    | 0.80178   |
| PC ae C36:1                                 | 1.4557           | 0.54169  | 0.15784    | 0.80178   |
| PC aa C40:3                                 | 0.80283          | -0.31683 | 0.15784    | 0.80178   |
| PC ae C44:3                                 | 2.2011           | 1.1382   | 0.15844    | 0.80014   |
| PC ae C44:4                                 | 2.3793           | 1.2506   | 0.16631    | 0.77909   |
| SM C18:1                                    | 1.5054           | 0.5901   | 0.16631    | 0.77909   |
| PC aa C32:1                                 | 1.4444           | 0.53048  | 0.16631    | 0.77909   |
| PE aa 40:4                                  | 0.71702          | -0.47991 | 0.17674    | 0.75266   |
| PE aa 34:4                                  | 2.288            | 1.1941   | 0.1783     | 0.74885   |
| PC ae C42:1                                 | 0.55538          | -0.84846 | 0.1783     | 0.74885   |
| PE aa 36:5                                  | 1.6178           | 0.69406  | 0.1783     | 0.74885   |
| PC aa C40:6                                 | 0.6252           | -0.67761 | 0.1783     | 0.74885   |
| PE aa 40:5                                  | 0.68707          | -0.54147 | 0.1783     | 0.74885   |
| PE ae 42:0                                  | 0.74884          | -0.41727 | 0.1783     | 0.74885   |
| SM (OH) C24:1                               | 0.61739          | -0.69576 | 0.19474    | 0.71053   |
| PC ae C38:2                                 | 1.3991           | 0.48452  | 0.21194    | 0.67379   |
| lysoPE a C20:4                              | 1.9296           | 0.94833  | 0.21584    | 0.66587   |

|                 |         |          |         |         |
|-----------------|---------|----------|---------|---------|
| lysoPC a C28:1  | 1.3809  | 0.46565  | 0.21584 | 0.66587 |
| PE aa 36:8      | 1.7566  | 0.8128   | 0.22263 | 0.65241 |
| GCer-d18:1/18:0 | 1.6635  | 0.73424  | 0.22263 | 0.65241 |
| PC aa C42:6     | 0.62995 | -0.66669 | 0.22263 | 0.65241 |
| PC ae C32:1     | 1.5566  | 0.63843  | 0.22263 | 0.65241 |
| PC ae C30:1     | 1.6404  | 0.71409  | 0.23692 | 0.62541 |
| lysoPE a C18:0  | 1.8921  | 0.91997  | 0.24003 | 0.61973 |
| PC aa C32:0     | 1.3675  | 0.45155  | 0.25146 | 0.59952 |
| PE ae 34:0      | 1.486   | 0.57141  | 0.25473 | 0.59391 |
| SM C16:0        | 1.4188  | 0.50464  | 0.25473 | 0.59391 |
| PE aa 36:6      | 1.8516  | 0.8888   | 0.27083 | 0.5673  |
| PC aa C36:3     | 1.2657  | 0.33995  | 0.27256 | 0.56453 |
| PE ae 38:0      | 1.606   | 0.6835   | 0.27425 | 0.56185 |
| PE aa 38:6      | 1.3515  | 0.43461  | 0.27425 | 0.56185 |
| PE aa 34:1      | 1.394   | 0.47919  | 0.27845 | 0.55525 |
| PC ae C38:5     | 0.52448 | -0.93104 | 0.29364 | 0.53218 |
| PS C38:3        | 0.55054 | -0.86107 | 0.29364 | 0.53218 |
| PI C38:3        | 0.56616 | -0.82072 | 0.29364 | 0.53218 |
| PS C38:4        | 1.7243  | 0.78599  | 0.29364 | 0.53218 |
| PE aa 38:7      | 1.4984  | 0.58343  | 0.29364 | 0.53218 |
| PC ae C32:2     | 1.4959  | 0.58097  | 0.29364 | 0.53218 |
| lysoPC a C17:0  | 1.3547  | 0.438    | 0.29364 | 0.53218 |
| PE aa 38:8      | 1.2578  | 0.33088  | 0.29364 | 0.53218 |
| PE aa 34:2      | 1.527   | 0.61069  | 0.29598 | 0.52874 |
| PE aa 42:4      | 0.67576 | -0.56543 | 0.29598 | 0.52874 |
| PE aa 40:3      | 0.70032 | -0.51392 | 0.29598 | 0.52874 |
| PE ae 40:4      | 0.7379  | -0.43851 | 0.32136 | 0.493   |
| lysoPC a C16:0  | 1.2527  | 0.32506  | 0.32136 | 0.493   |
| PE aa 44:6      | 0.66698 | -0.58428 | 0.32538 | 0.48761 |
| PE aa 42:9      | 0.69103 | -0.53318 | 0.33801 | 0.47106 |
| PE ae 38:6      | 1.2854  | 0.36218  | 0.33801 | 0.47106 |
| PC aa C42:2     | 0.72935 | -0.45532 | 0.3385  | 0.47044 |
| PE ae 40:5      | 0.79733 | -0.32675 | 0.35748 | 0.44675 |
| PE aa 42:8      | 0.76056 | -0.39487 | 0.3578  | 0.44636 |
| PE ae 38:5      | 1.3001  | 0.37867  | 0.3578  | 0.44636 |
| PC aa C36:6     | 1.2948  | 0.37269  | 0.3578  | 0.44636 |
| PE aa 32:0      | 2.0952  | 1.0671   | 0.36009 | 0.44359 |
| PE aa 34:0      | 1.3148  | 0.3948   | 0.37241 | 0.42898 |
| GCer-d18:1/16:0 | 1.5565  | 0.63828  | 0.37257 | 0.42879 |
| PC aa C30:0     | 1.3054  | 0.38449  | 0.37257 | 0.42879 |
| PE ae 40:1      | 1.5836  | 0.66323  | 0.37384 | 0.42731 |
| PC ae C42:2     | 0.66233 | -0.59437 | 0.37384 | 0.42731 |
| PI C38:4        | 0.70787 | -0.49844 | 0.37384 | 0.42731 |
| PC aa C30:2     | 1.304   | 0.3829   | 0.37384 | 0.42731 |
| lysoPE a C16:0  | 1.5228  | 0.60668  | 0.3758  | 0.42505 |
| lysoPC a C26:0  | 1.4018  | 0.48725  | 0.3758  | 0.42505 |
| PE aa 42:6      | 0.77213 | -0.37308 | 0.3758  | 0.42505 |
| PE aa 40:9      | 1.2861  | 0.36298  | 0.3758  | 0.42505 |
| PC ae C34:0     | 1.1942  | 0.25607  | 0.37583 | 0.42501 |
| PC aa C32:3     | 1.3244  | 0.40538  | 0.37913 | 0.42121 |
| PC ae C40:5     | 0.6488  | -0.62416 | 0.38212 | 0.4178  |
| Linoleic acid   | 1.2962  | 0.37427  | 0.38212 | 0.4178  |
| PC aa C34:4     | 1.2201  | 0.28702  | 0.38212 | 0.4178  |

|                  |         |          |         |         |
|------------------|---------|----------|---------|---------|
| PE ae 38:2       | 1.2708  | 0.34571  | 0.40078 | 0.3971  |
| PC ae C34:2      | 1.2882  | 0.36537  | 0.40314 | 0.39454 |
| PE aa 36:4       | 1.4249  | 0.51083  | 0.4369  | 0.35962 |
| Cer-d18:1/24:1   | 0.70624 | -0.50177 | 0.44037 | 0.35619 |
| PE aa 36:2       | 0.80128 | -0.31963 | 0.44496 | 0.35168 |
| PC ae C40:6      | 0.62817 | -0.67078 | 0.44509 | 0.35155 |
| SM (OH) C14:1    | 1.4759  | 0.56158  | 0.46166 | 0.33568 |
| PC ae C38:1      | 1.2859  | 0.36277  | 0.46214 | 0.33522 |
| SM C20:2         | 1.2129  | 0.27847  | 0.47316 | 0.32499 |
| PC ae C38:6      | 0.66195 | -0.5952  | 0.47712 | 0.32137 |
| PC ae C38:0      | 1.1493  | 0.20081  | 0.47712 | 0.32137 |
| PC aa C34:1      | 1.1056  | 0.14482  | 0.47712 | 0.32137 |
| Arachidonic acid | 0.70357 | -0.50723 | 0.48082 | 0.31802 |
| PS C40:7         | 1.37    | 0.45417  | 0.52104 | 0.28313 |
| lysoPC a C18:1   | 1.1841  | 0.24375  | 0.52104 | 0.28313 |
| PS C40:5         | 1.314   | 0.39392  | 0.52711 | 0.2781  |
| PC ae C44:6      | 1.3102  | 0.38973  | 0.52711 | 0.2781  |
| PC ae C40:4      | 0.80703 | -0.30931 | 0.5307  | 0.27515 |
| PC aa C38:0      | 0.55219 | -0.85675 | 0.53551 | 0.27124 |
| PC ae C40:1      | 0.75643 | -0.40273 | 0.53551 | 0.27124 |
| PC ae C30:2      | 1.2626  | 0.33635  | 0.53551 | 0.27124 |
| lysoPC a C26:1   | 1.1803  | 0.2392   | 0.55639 | 0.25462 |
| PC ae C38:4      | 0.80196 | -0.3184  | 0.57442 | 0.24077 |
| PE aa 40:8       | 1.1526  | 0.20491  | 0.57442 | 0.24077 |
| PE ae 42:1       | 0.71541 | -0.48317 | 0.59335 | 0.22669 |
| lysoPE a C18:1   | 1.3425  | 0.42491  | 0.59335 | 0.22669 |
| PS C36:2         | 1.258   | 0.33115  | 0.59335 | 0.22669 |
| PC ae C36:4      | 0.80536 | -0.31229 | 0.59335 | 0.22669 |
| PC aa C28:1      | 1.2131  | 0.27871  | 0.59335 | 0.22669 |
| PS C38:5         | 1.178   | 0.23634  | 0.59335 | 0.22669 |
| PE aa 38:0       | 1.1464  | 0.19706  | 0.59335 | 0.22669 |
| PC aa C36:2      | 1.1092  | 0.14954  | 0.59335 | 0.22669 |
| lysoPE a C14:0   | 0.48468 | -1.0449  | 0.5978  | 0.22344 |
| lysoPE a C18:2   | 1.6094  | 0.68651  | 0.5978  | 0.22344 |
| Palmitic acid    | 0.74211 | -0.4303  | 0.5978  | 0.22344 |
| PE ae 40:3       | 0.75701 | -0.40161 | 0.5978  | 0.22344 |
| lysoPC a C18:0   | 0.77393 | -0.36973 | 0.5978  | 0.22344 |
| PC ae C40:3      | 1.171   | 0.22771  | 0.5978  | 0.22344 |
| PC aa C40:2      | 0.89107 | -0.16638 | 0.5978  | 0.22344 |
| PC aa C38:3      | 0.92631 | -0.11043 | 0.5978  | 0.22344 |
| lysoPC a C20:4   | 0.803   | -0.31652 | 0.61839 | 0.20874 |
| PC ae C34:1      | 1.095   | 0.13092  | 0.63543 | 0.19693 |
| PE aa 38:2       | 1.1461  | 0.19678  | 0.63586 | 0.19664 |
| SM C24:1         | 1.0719  | 0.1002   | 0.63586 | 0.19664 |
| PE ae 38:1       | 0.78158 | -0.35553 | 0.63804 | 0.19515 |
| PC aa C26:0      | 1.1411  | 0.19045  | 0.64147 | 0.19283 |
| PC ae C36:3      | 1.1234  | 0.16788  | 0.64362 | 0.19137 |
| Stearic acid     | 0.77738 | -0.3633  | 0.66701 | 0.17587 |
| PC aa C24:0      | 1.1068  | 0.14636  | 0.66932 | 0.17437 |
| PC ae C44:5      | 1.2883  | 0.36547  | 0.68441 | 0.16468 |
| PC ae C40:2      | 1.1556  | 0.20859  | 0.71434 | 0.1461  |
| PI C38:5         | 0.87425 | -0.19389 | 0.7243  | 0.14008 |
| Cer-d18:1/18:0   | 1.08    | 0.11103  | 0.7243  | 0.14008 |

|                 |         |           |         |           |
|-----------------|---------|-----------|---------|-----------|
| PC ae C38:3     | 1.0745  | 0.1036    | 0.7243  | 0.14008   |
| PC ae C36:5     | 0.68993 | -0.53548  | 0.73054 | 0.13636   |
| PE aa 40:2      | 0.92608 | -0.11078  | 0.74069 | 0.13036   |
| PS C40:6        | 1.0435  | 0.061459  | 0.7585  | 0.12004   |
| PC ae C34:3     | 1.0501  | 0.070501  | 0.76945 | 0.11382   |
| PE aa 40:10     | 0.93712 | -0.093699 | 0.77364 | 0.11146   |
| PE aa 40:7      | 1.0476  | 0.067151  | 0.77364 | 0.11146   |
| PE ae 38:3      | 1.0762  | 0.10589   | 0.78592 | 0.10462   |
| PE aa 38:3      | 1.0672  | 0.093888  | 0.78592 | 0.10462   |
| SM C26:1        | 0.95089 | -0.072643 | 0.78592 | 0.10462   |
| lysoPC a C28:0  | 1.035   | 0.049654  | 0.78592 | 0.10462   |
| Oleic acid      | 1.0282  | 0.040066  | 0.78592 | 0.10462   |
| PE ae 40:0      | 1.0339  | 0.048108  | 0.80092 | 0.09641   |
| PE aa 42:10     | 0.90273 | -0.14764  | 0.81092 | 0.091022  |
| Cer-d18:1/16:0  | 0.81294 | -0.29878  | 0.83163 | 0.08007   |
| PE aa 44:9      | 0.91588 | -0.12677  | 0.84395 | 0.073685  |
| PC aa C36:1     | 0.92255 | -0.1163   | 0.85622 | 0.067417  |
| SM C24:0        | 1.0587  | 0.082279  | 0.86551 | 0.062729  |
| PC aa C38:1     | 0.91586 | -0.1268   | 0.86551 | 0.062729  |
| PE aa 38:5      | 0.94118 | -0.087461 | 0.87154 | 0.059711  |
| GCer-d18:1/24:1 | 0.9056  | -0.14305  | 0.88325 | 0.053915  |
| Margaric acid   | 0.85034 | -0.23389  | 0.88845 | 0.051365  |
| SM C26:0        | 1.0172  | 0.024612  | 0.89767 | 0.046886  |
| PE aa 42:7      | 0.91827 | -0.12301  | 0.89767 | 0.046886  |
| Nervonic acid   | 0.91211 | -0.13272  | 0.89767 | 0.046886  |
| PC aa C36:5     | 0.88699 | -0.17301  | 0.89767 | 0.046886  |
| SM C22:3        | 0.88699 | -0.17301  | 0.89767 | 0.046886  |
| PE aa 38:1      | 1.0141  | 0.020245  | 0.90636 | 0.042701  |
| PE aa 38:4      | 0.96676 | -0.048764 | 0.90636 | 0.042701  |
| SM C16:1        | 0.9299  | -0.10486  | 0.90636 | 0.042701  |
| PE aa 40:1      | 0.8765  | -0.19017  | 0.90636 | 0.042701  |
| PE ae 40:7      | 0.98851 | -0.01667  | 0.9168  | 0.037725  |
| PE aa 36:1      | 0.98181 | -0.026483 | 0.9548  | 0.020087  |
| PC aa C38:6     | 0.9759  | -0.035191 | 0.9548  | 0.020087  |
| lysoPE a C16:1  | 0.70651 | -0.50121  | 0.95852 | 0.018399  |
| PS C36:1        | 0.9501  | -0.073843 | 0.95926 | 0.018065  |
| PC aa C36:0     | 1.0054  | 0.0078197 | 0.97796 | 0.0096776 |
| PC ae C36:0     | 0.99009 | -0.014375 | 0.97796 | 0.0096776 |
| PE ae 42:2      | 0.92047 | -0.11956  | 0.97796 | 0.0096776 |
| PC aa C38:6     | 0.96221 | -0.055575 | 0.98784 | 0.0053141 |
| PE ae 42:2      | 0.91753 | -0.12418  | 0.99136 | 0.0037708 |

#### B) Lipidomic profile siGPR17 vs neg - DID 5

| Lipid       | Fold change (FC) | log2(FC) | p.adjusted | -LOG10(p) |
|-------------|------------------|----------|------------|-----------|
| PE aa 40:4  | 0.58499          | -0.77351 | 0.033966   | 1.469     |
| PC aa C42:5 | 0.50293          | -0.99156 | 0.033966   | 1.469     |
| PC aa C42:6 | 0.55635          | -0.84593 | 0.036049   | 1.4431    |
| PE aa 40:5  | 0.54963          | -0.86347 | 0.036049   | 1.4431    |
| PE aa 34:3  | 1.9353           | 0.95256  | 0.042192   | 1.3748    |
| PC ae C32:2 | 2.0973           | 1.0685   | 0.048833   | 1.3113    |
| PC ae C38:2 | 1.5238           | 0.60772  | 0.048833   | 1.3113    |



|               |         |          |          |         |
|---------------|---------|----------|----------|---------|
| PC ae C36:2   | 1.5207  | 0.60475  | 0.048833 | 1.3113  |
| PE aa 40:6    | 0.69919 | -0.51625 | 0.048833 | 1.3113  |
| PE aa 42:5    | 0.5765  | -0.79461 | 0.048833 | 1.3113  |
| PC ae C36:1   | 1.4594  | 0.54536  | 0.060947 | 1.215   |
| PC aa C42:2   | 0.6654  | -0.58772 | 0.060947 | 1.215   |
| SM C18:1      | 1.8549  | 0.89134  | 0.064409 | 1.1911  |
| SM (OH) C16:1 | 1.6952  | 0.76146  | 0.064409 | 1.1911  |
| PC ae C30:1   | 1.6309  | 0.70565  | 0.064409 | 1.1911  |
| PE aa 42:7    | 0.68831 | -0.53888 | 0.064409 | 1.1911  |
| PC ae C34:2   | 1.5716  | 0.65227  | 0.066292 | 1.1785  |
| PE aa 42:6    | 0.66596 | -0.5865  | 0.066292 | 1.1785  |
| PC aa C40:4   | 0.6871  | -0.5414  | 0.076325 | 1.1173  |
| PC aa C40:5   | 0.65091 | -0.61947 | 0.091207 | 1.04    |
| PC ae C32:1   | 1.5628  | 0.64412  | 0.11468  | 0.94051 |
| PC ae C38:3   | 1.4357  | 0.52176  | 0.11468  | 0.94051 |
| PE aa 38:5    | 0.7727  | -0.37202 | 0.11468  | 0.94051 |
| PE aa 42:8    | 0.68327 | -0.54948 | 0.11891  | 0.92478 |
| PE ae 42:1    | 0.68279 | -0.55049 | 0.12802  | 0.89272 |
| PE ae 42:0    | 0.59598 | -0.74668 | 0.12816  | 0.89225 |
| PC ae C36:3   | 1.4526  | 0.53865  | 0.13236  | 0.87825 |
| PC ae C42:0   | 0.56255 | -0.82994 | 0.15319  | 0.81477 |
| PC aa C42:4   | 0.64794 | -0.62607 | 0.15319  | 0.81477 |
| PC ae C34:3   | 1.436   | 0.52203  | 0.15538  | 0.80859 |
| PC aa C32:1   | 1.3067  | 0.38588  | 0.15538  | 0.80859 |
| PE aa 40:7    | 0.77512 | -0.36751 | 0.15538  | 0.80859 |
| PE aa 36:2    | 0.5832  | -0.77794 | 0.16491  | 0.78275 |
| PE ae 40:5    | 0.61822 | -0.6938  | 0.1789   | 0.74738 |
| PC aa C40:4   | 0.69663 | -0.52155 | 0.19248  | 0.71561 |
| PC aa C30:2   | 1.496   | 0.58115  | 0.19546  | 0.70894 |
| PC aa C38:5   | 0.71727 | -0.47941 | 0.21008  | 0.67761 |
| PE aa 44:6    | 0.43106 | -1.214   | 0.23967  | 0.62039 |
| PE aa 42:4    | 0.63367 | -0.65821 | 0.23967  | 0.62039 |
| PC ae C42:1   | 0.51617 | -0.95408 | 0.24444  | 0.61183 |
| SM (OH) C14:1 | 1.4432  | 0.52923  | 0.30615  | 0.51406 |
| PE aa 42:9    | 0.69083 | -0.53359 | 0.31276  | 0.50478 |
| PC aa C32:2   | 1.3658  | 0.44978  | 0.31276  | 0.50478 |
| PC aa C38:4   | 0.74804 | -0.41881 | 0.31276  | 0.50478 |
| PE aa 38:4    | 0.75326 | -0.40878 | 0.31276  | 0.50478 |
| PE ae 40:4    | 0.76979 | -0.37747 | 0.31276  | 0.50478 |
| PE aa 42:10   | 0.62977 | -0.6671  | 0.32494  | 0.4882  |
| SM C16:1      | 1.4679  | 0.55373  | 0.32494  | 0.4882  |
| PC aa C40:6   | 0.73414 | -0.44587 | 0.32494  | 0.4882  |
| PE ae 40:3    | 0.76847 | -0.37994 | 0.32494  | 0.4882  |
| SM C24:1      | 1.2621  | 0.33579  | 0.32494  | 0.4882  |
| PE aa 36:1    | 0.81687 | -0.29182 | 0.32494  | 0.4882  |
| PE aa 40:3    | 0.85028 | -0.234   | 0.32494  | 0.4882  |
| PC aa C36:3   | 1.1242  | 0.16896  | 0.32494  | 0.4882  |
| PS C38:4      | 1.7691  | 0.823    | 0.3308   | 0.48044 |
| PC aa C36:4   | 0.64673 | -0.62877 | 0.3308   | 0.48044 |
| PE aa 32:1    | 1.504   | 0.5888   | 0.3308   | 0.48044 |
| PC ae C30:0   | 1.4598  | 0.5458   | 0.3308   | 0.48044 |
| PE ae 38:2    | 1.4109  | 0.49666  | 0.3308   | 0.48044 |
| PC aa C38:6   | 0.73447 | -0.44523 | 0.3308   | 0.48044 |

|                 |         |           |         |         |
|-----------------|---------|-----------|---------|---------|
| SM (OH) C22:1   | 1.3802  | 0.46492   | 0.33356 | 0.47683 |
| SM C24:0        | 1.3254  | 0.40645   | 0.34211 | 0.46583 |
| PC aa C36:2     | 1.2296  | 0.29824   | 0.35445 | 0.45044 |
| lysoPC a C20:3  | 1.724   | 0.78575   | 0.35899 | 0.44491 |
| PC aa C36:1     | 1.2817  | 0.35808   | 0.35947 | 0.44433 |
| PI C38:5        | 0.73912 | -0.43612  | 0.35986 | 0.44387 |
| PC ae C42:2     | 0.55084 | -0.8603   | 0.36494 | 0.43778 |
| PE ae 38:4      | 0.78221 | -0.35437  | 0.3682  | 0.43391 |
| PE ae 36:1      | 1.4657  | 0.55159   | 0.37261 | 0.42875 |
| lysoPE a C20:4  | 0.54136 | -0.88535  | 0.37694 | 0.42373 |
| SM C18:0        | 1.5341  | 0.61737   | 0.37694 | 0.42373 |
| PC ae C40:5     | 0.6956  | -0.52367  | 0.37694 | 0.42373 |
| lysoPC a C16:1  | 1.4343  | 0.5203    | 0.37694 | 0.42373 |
| lysoPC a C26:1  | 1.3126  | 0.39245   | 0.37694 | 0.42373 |
| PC aa C32:3     | 1.2852  | 0.36199   | 0.37694 | 0.42373 |
| PE ae 42:2      | 0.6718  | -0.5739   | 0.38014 | 0.42005 |
| PS C40:6        | 1.5092  | 0.59374   | 0.38689 | 0.41241 |
| PE aa 36:8      | 1.5     | 0.58492   | 0.38689 | 0.41241 |
| lysoPC a C18:2  | 1.3996  | 0.48503   | 0.38689 | 0.41241 |
| PC aa C38:1     | 0.83393 | -0.262    | 0.38689 | 0.41241 |
| lysoPC a C18:1  | 1.682   | 0.7502    | 0.40139 | 0.39644 |
| PC ae C40:2     | 1.3567  | 0.44007   | 0.40561 | 0.39189 |
| PE aa 44:9      | 0.79611 | -0.32897  | 0.41863 | 0.37817 |
| Linoleic acid   | 1.3367  | 0.41867   | 0.44805 | 0.34867 |
| PS C36:2        | 1.4578  | 0.54383   | 0.4519  | 0.34496 |
| PC ae C40:3     | 1.1611  | 0.21546   | 0.45672 | 0.34035 |
| lysoPE a C16:1  | 0.62203 | -0.68495  | 0.4702  | 0.32772 |
| PS C38:5        | 1.5119  | 0.59639   | 0.4702  | 0.32772 |
| PC aa C40:2     | 0.80869 | -0.30634  | 0.48098 | 0.31788 |
| PE aa 38:1      | 1.1587  | 0.21249   | 0.50561 | 0.29619 |
| GCer-d18:1/18:0 | 1.4482  | 0.53427   | 0.51442 | 0.28869 |
| lysoPC a C16:0  | 1.5035  | 0.58836   | 0.5152  | 0.28802 |
| PC aa C36:5     | 0.75511 | -0.40524  | 0.5152  | 0.28802 |
| SM C22:3        | 0.75511 | -0.40524  | 0.5152  | 0.28802 |
| PC ae C40:6     | 0.75775 | -0.4002   | 0.5152  | 0.28802 |
| PC aa C36:0     | 1.1915  | 0.25277   | 0.5152  | 0.28802 |
| PE aa 38:6      | 0.93978 | -0.089608 | 0.5152  | 0.28802 |
| PE ae 40:0      | 0.848   | -0.23787  | 0.53339 | 0.27296 |
| PC aa C34:2     | 1.1314  | 0.17809   | 0.53795 | 0.26926 |
| PE ae 38:3      | 1.1502  | 0.20184   | 0.5484  | 0.2609  |
| PC aa C40:3     | 0.89227 | -0.16444  | 0.5484  | 0.2609  |
| PC ae C44:5     | 1.3724  | 0.45666   | 0.54916 | 0.2603  |
| Stearic acid    | 0.62607 | -0.6756   | 0.56065 | 0.25131 |
| PC ae C38:1     | 1.2184  | 0.28502   | 0.5701  | 0.24405 |
| Palmitic acid   | 0.66494 | -0.5887   | 0.57211 | 0.24252 |
| PC ae C40:1     | 0.61809 | -0.69411  | 0.57669 | 0.23906 |
| PI C38:3        | 1.5983  | 0.67652   | 0.58531 | 0.23261 |
| Cer-d18:1/24:1  | 0.73956 | -0.43526  | 0.58531 | 0.23261 |
| SM C16:0        | 1.3071  | 0.38639   | 0.58531 | 0.23261 |
| SM C26:0        | 0.78947 | -0.34105  | 0.58531 | 0.23261 |
| PC ae C38:4     | 0.81459 | -0.29586  | 0.58531 | 0.23261 |
| PE aa 36:4      | 0.87709 | -0.1892   | 0.58531 | 0.23261 |
| PE aa 40:8      | 0.87858 | -0.18675  | 0.58531 | 0.23261 |

|                  |         |           |         |          |
|------------------|---------|-----------|---------|----------|
| PE ae 38:6       | 0.90782 | -0.13953  | 0.58531 | 0.23261  |
| PC aa C38:3      | 1.0827  | 0.11462   | 0.63943 | 0.19421  |
| PE aa 32:0       | 0.89334 | -0.16272  | 0.64616 | 0.18966  |
| PE ae 38:0       | 0.80833 | -0.30698  | 0.64873 | 0.18793  |
| Margaric acid    | 0.66459 | -0.58946  | 0.68201 | 0.16621  |
| PC ae C44:4      | 1.3957  | 0.48101   | 0.68201 | 0.16621  |
| lysoPE a C18:2   | 1.0219  | 0.031231  | 0.68201 | 0.16621  |
| Cer-d18:1/16:0   | 0.72401 | -0.46593  | 0.68671 | 0.16323  |
| PE ae 38:5       | 1.1582  | 0.21188   | 0.69175 | 0.16005  |
| lysoPC a C28:1   | 1.1375  | 0.18591   | 0.69175 | 0.16005  |
| PE aa 40:2       | 0.90099 | -0.15042  | 0.69175 | 0.16005  |
| PE aa 38:0       | 1.1065  | 0.14594   | 0.69433 | 0.15844  |
| lysoPC a C20:4   | 0.77289 | -0.37167  | 0.71735 | 0.14427  |
| GCer-d18:1/16:0  | 1.2683  | 0.34288   | 0.71735 | 0.14427  |
| PE aa 38:2       | 1.0864  | 0.11958   | 0.72817 | 0.13776  |
| lysoPC a C18:0   | 1.2685  | 0.3431    | 0.73174 | 0.13565  |
| PC ae C40:4      | 0.91863 | -0.12244  | 0.73174 | 0.13565  |
| lysoPE a C16:0   | 1.2068  | 0.27121   | 0.74857 | 0.12577  |
| SM C20:2         | 0.83914 | -0.25301  | 0.75335 | 0.123    |
| PE aa 38:8       | 0.85287 | -0.22961  | 0.75335 | 0.123    |
| PC aa C30:0      | 1.0799  | 0.11086   | 0.75335 | 0.123    |
| PS C38:3         | 0.96276 | -0.054757 | 0.75489 | 0.12212  |
| PC aa C24:0      | 0.7643  | -0.3878   | 0.76265 | 0.11767  |
| PS C36:1         | 1.2946  | 0.37249   | 0.77577 | 0.11027  |
| PC aa C34:4      | 0.82695 | -0.27413  | 0.77577 | 0.11027  |
| PE aa 34:2       | 1.0879  | 0.12149   | 0.77577 | 0.11027  |
| PC aa C36:6      | 1.086   | 0.11904   | 0.78784 | 0.10356  |
| PE ae 38:1       | 1.0962  | 0.13245   | 0.79379 | 0.10029  |
| lysoPC a C17:0   | 1.2242  | 0.29181   | 0.80778 | 0.092709 |
| PI C38:4         | 0.92933 | -0.10574  | 0.80778 | 0.092709 |
| PE aa 34:4       | 1.2674  | 0.34187   | 0.82036 | 0.085994 |
| lysoPE a C18:1   | 1.2512  | 0.3233    | 0.82036 | 0.085994 |
| PC aa C26:0      | 1.1798  | 0.23858   | 0.82036 | 0.085994 |
| PE aa 34:3       | 1.1134  | 0.15503   | 0.82036 | 0.085994 |
| GCer-d18:1/24:1  | 1.0651  | 0.090928  | 0.82036 | 0.085994 |
| PE aa 38:3       | 1.0587  | 0.08225   | 0.82036 | 0.085994 |
| PC ae C34:0      | 1.0573  | 0.080394  | 0.82036 | 0.085994 |
| PC ae C36:4      | 0.92682 | -0.10963  | 0.82036 | 0.085994 |
| PC ae C38:5      | 0.86418 | -0.2106   | 0.82036 | 0.085994 |
| Nervonic acid    | 0.83533 | -0.25958  | 0.82036 | 0.085994 |
| Arachidonic acid | 0.77426 | -0.36911  | 0.82036 | 0.085994 |
| PC ae C44:3      | 0.71795 | -0.47805  | 0.82036 | 0.085994 |
| lysoPE a C18:0   | 0.68534 | -0.5451   | 0.82036 | 0.085994 |
| PS C40:5         | 0.62687 | -0.67375  | 0.82036 | 0.085994 |
| PE aa 36:6       | 1.0289  | 0.041166  | 0.82117 | 0.085569 |
| lysoPC a C24:0   | 1.0128  | 0.018418  | 0.82199 | 0.085132 |
| Cer-d18:1/18:0   | 0.75849 | -0.39879  | 0.82199 | 0.085132 |
| PC ae C34:1      | 1.0646  | 0.090269  | 0.8257  | 0.08318  |
| PE aa 40:1       | 0.84858 | -0.23688  | 0.8257  | 0.08318  |
| PE aa 32:2       | 0.98082 | -0.027946 | 0.82886 | 0.081521 |
| PC aa C38:0      | 0.92846 | -0.10708  | 0.83273 | 0.079497 |
| PC aa C34:1      | 1.0181  | 0.025818  | 0.84325 | 0.074044 |
| lysoPC a C28:0   | 0.94371 | -0.083578 | 0.84325 | 0.074044 |

|                |         |           |         |           |
|----------------|---------|-----------|---------|-----------|
| PE aa 40:10    | 0.82632 | -0.27523  | 0.84325 | 0.074044  |
| SM (OH) C24:1  | 0.6314  | -0.66338  | 0.84325 | 0.074044  |
| Oleic acid     | 0.99818 | -0.002633 | 0.84471 | 0.073291  |
| PE aa 36:5     | 0.98065 | -0.028187 | 0.84471 | 0.073291  |
| PS C40:7       | 1.0662  | 0.092454  | 0.85547 | 0.067794  |
| PE ae 40:1     | 1.0657  | 0.091792  | 0.85547 | 0.067794  |
| PE aa 40:9     | 1.0392  | 0.05552   | 0.85547 | 0.067794  |
| PC aa C32:0    | 1.0355  | 0.05029   | 0.85547 | 0.067794  |
| PC ae C36:0    | 1.0071  | 0.010172  | 0.85547 | 0.067794  |
| PE aa 34:0     | 0.91348 | -0.13055  | 0.85547 | 0.067794  |
| PC ae C38:0    | 0.85915 | -0.21902  | 0.85547 | 0.067794  |
| PC ae C36:5    | 1.1024  | 0.14066   | 0.8727  | 0.059135  |
| PE aa 34:1     | 0.91328 | -0.13087  | 0.88491 | 0.053101  |
| lysoPC a C14:0 | 1.3115  | 0.39118   | 0.89596 | 0.047713  |
| PE aa 38:7     | 1.042   | 0.059339  | 0.91407 | 0.03902   |
| PE aa 36:3     | 1.0256  | 0.036453  | 0.91407 | 0.03902   |
| PC ae C44:6    | 0.90256 | -0.14791  | 0.91407 | 0.03902   |
| PC aa C28:1    | 1.145   | 0.19541   | 0.95709 | 0.019046  |
| PE ae 40:7     | 0.99316 | -0.009903 | 0.95709 | 0.019046  |
| PC aa C34:3    | 0.99559 | -0.006379 | 0.96072 | 0.017405  |
| lysoPC a C26:0 | 1.0687  | 0.095901  | 0.97969 | 0.0089092 |
| PE ae 34:0     | 0.9798  | -0.029443 | 0.97969 | 0.0089092 |
| lysoPE a C14:0 | 0.97539 | -0.035956 | 0.97969 | 0.0089092 |
| PC ae C38:6    | 0.94888 | -0.075695 | 0.97969 | 0.0089092 |
| PC ae C30:2    | 0.90037 | -0.15141  | 0.97969 | 0.0089092 |
| SM C26:1       | 0.99244 | -0.010953 | 0.98842 | 0.0050592 |

---
